# Supplementary material for: Immunoautophagy-Related Long Noncoding RNA (IAR-lncRNA) Signature Predicts Survival in Hepatocellular Carcinoma
Source: MDPI journal article supplement (doi:10.3390/biology10121301), 2021-12-09
Supplement: s1 [file s1]

| immuneGene | lncRNA      | cor          | pvalue   | relation |
|------------|-------------|--------------|----------|----------|
| GHR        | SNHG6       | -0.635309216 | 1.19E-42 | negative |
| AQP9       | AC008549.1  | 0.667115187  | 2.39E-48 | postive  |
| BIRC5      | AL035461.2  | 0.669770746  | 7.44E-49 | postive  |
| HRAS       | AP001505.1  | 0.604564133  | 9.55E-38 | postive  |
| PLXNA1     | DCXR-DT     | -0.619382639 | 4.82E-40 | negative |
| BIRC5      | TMPO-AS1    | 0.64375773   | 4.24E-44 | postive  |
| S100A11    | AC138207.5  | 0.626713324  | 3.17E-41 | postive  |
| PLAUR      | AC138207.5  | 0.610269933  | 1.29E-38 | postive  |
| CMTM7      | AC138207.5  | 0.604395042  | 1.01E-37 | postive  |
| CCR7       | PCED1B-AS1  | 0.692881337  | 1.67E-53 | postive  |
| PLAUR      | PCED1B-AS1  | 0.600488859  | 3.89E-37 | postive  |
| CMTM7      | PCED1B-AS1  | 0.601516978  | 2.74E-37 | postive  |
| IL18RAP    | PCED1B-AS1  | 0.712027887  | 1.05E-57 | postive  |
| CREB1      | AC005288.1  | 0.732917469  | 1.07E-62 | postive  |
| PSME3      | AC005288.1  | 0.701860861  | 1.97E-55 | postive  |
| DCK        | AC005288.1  | 0.758346624  | 1.89E-69 | postive  |
| LIMS1      | AC005288.1  | 0.684100352  | 1.09E-51 | postive  |
| NRAS       | AC005288.1  | 0.641065252  | 1.24E-43 | postive  |
| BCL10      | AC005288.1  | 0.642597818  | 6.75E-44 | postive  |
| PIK3CB     | AC005288.1  | 0.604825039  | 8.72E-38 | postive  |
| GMFB       | AC005288.1  | 0.619133946  | 5.28E-40 | postive  |
| BRD8       | AC005288.1  | 0.608728865  | 2.22E-38 | postive  |
| GRB2       | AC005288.1  | 0.608749052  | 2.21E-38 | postive  |
| CREB1      | NORAD       | 0.61640033   | 1.43E-39 | postive  |
| EED        | BACE1-AS    | 0.625818345  | 4.44E-41 | postive  |
| CREB1      | FGD5-AS1    | 0.706879812  | 1.53E-56 | postive  |
| DCK        | FGD5-AS1    | 0.750831337  | 2.28E-67 | postive  |
| LIMS1      | FGD5-AS1    | 0.660355379  | 4.44E-47 | postive  |
| NRAS       | FGD5-AS1    | 0.66689584   | 2.64E-48 | postive  |
| PIK3CB     | FGD5-AS1    | 0.607429227  | 3.51E-38 | postive  |
| CREB1      | ANKRD10-IT1 | 0.67007686   | 6.50E-49 | postive  |
| S100A11    | AGAP2-AS1   | 0.615489069  | 1.99E-39 | postive  |
| PGF        | AGAP2-AS1   | 0.693129254  | 1.48E-53 | postive  |
| CREB1      | EBLN3P      | 0.632813756  | 3.12E-42 | postive  |
| DCK        | EBLN3P      | 0.669081048  | 1.01E-48 | postive  |
| EPO        | MIR210HG    | 0.637159102  | 5.78E-43 | postive  |
| HRAS       | AC073896.4  | 0.699359856  | 6.89E-55 | postive  |
| PLAUR      | PELATON     | 0.704953846  | 4.10E-56 | postive  |
| CREB1      | AC099850.3  | 0.66152719   | 2.69E-47 | postive  |
| PSME3      | AC099850.3  | 0.61535198   | 2.09E-39 | postive  |
| ISG20L2    | AC099850.3  | 0.622925607  | 1.31E-40 | postive  |
| DCK        | AC099850.3  | 0.679907935  | 7.67E-51 | postive  |
| LIMS1      | AC099850.3  | 0.616002971  | 1.65E-39 | postive  |
| BIRC5      | AC099850.3  | 0.70016809   | 4.60E-55 | postive  |
| NRAS       | AC099850.3  | 0.686726323  | 3.18E-52 | postive  |
| GRB2       | AC099850.3  | 0.667701276  | 1.85E-48 | postive  |

|         |              |              |          |          |
|---------|--------------|--------------|----------|----------|
| CDK4    | AC099850.3   | 0.667468495  | 2.05E-48 | positive |
| IL18RAP | LINC01871    | 0.74273543   | 3.29E-65 | positive |
| AQP9    | LINC01485    | 0.666184154  | 3.60E-48 | positive |
| PLXNA1  | LINC01485    | -0.634659645 | 1.53E-42 | negative |
| BIRC5   | AC026401.3   | 0.727354187  | 2.54E-61 | positive |
| HRAS    | AC026401.3   | 0.616560674  | 1.35E-39 | positive |
| CKLF    | AC026401.3   | 0.601894822  | 2.40E-37 | positive |
| TEK     | AC015922.2   | 0.619168766  | 5.22E-40 | positive |
| PSMD13  | MAPKAPK5-AS1 | 0.618850302  | 5.86E-40 | positive |
| PPIA    | MAPKAPK5-AS1 | 0.614059605  | 3.33E-39 | positive |
| HRAS    | MAPKAPK5-AS1 | 0.670359538  | 5.73E-49 | positive |
| CCR7    | AC004687.1   | 0.627987437  | 1.96E-41 | positive |
| IL18RAP | AC004687.1   | 0.61126783   | 9.04E-39 | positive |
| DCK     | AC115618.2   | 0.600308164  | 4.14E-37 | positive |
| NR1I2   | LINC01018    | 0.626286167  | 3.73E-41 | positive |
| ENG     | AC104083.1   | 0.611038699  | 9.80E-39 | positive |
| TEK     | AC104083.1   | 0.660449288  | 4.27E-47 | positive |
| HRAS    | CYTOR        | 0.62163455   | 2.11E-40 | positive |
| CKLF    | CYTOR        | 0.682774974  | 2.03E-51 | positive |
| EED     | SNHG1        | 0.644827553  | 2.76E-44 | positive |
| RBP4    | AC115619.1   | 0.624846854  | 6.39E-41 | positive |
| CREB1   | AC008764.2   | 0.606125602  | 5.54E-38 | positive |
| GHR     | ZFAS1        | -0.606478256 | 4.90E-38 | negative |
| AQP9    | TPRG1-AS1    | 0.671127542  | 4.08E-49 | positive |
| PLAUR   | MIR23AHG     | 0.641558544  | 1.02E-43 | positive |
| KLKB1   | F11-AS1      | 0.65937148   | 6.76E-47 | positive |
