# Supplementary material for: Immunoautophagy-Related Long Noncoding RNA (IAR-lncRNA) Signature Predicts Survival in Hepatocellular Carcinoma
Source: MDPI journal article supplement (doi:10.3390/biology10121301), 2021-12-09

Supplementary Files:

Supplementary Table S1: Information of multivariable Cox regression

| LncRNA     | $\beta$ | Hazard ratio |
|------------|---------|--------------|
| MIR210HG   | 0.359   | 1.432        |
| AC099850.3 | 0.555   | 1.741        |
| CYTOR      | 0.604   | 1.830        |

Supplementary Figure S1: Flow chart illustrating the defined strategy in the study

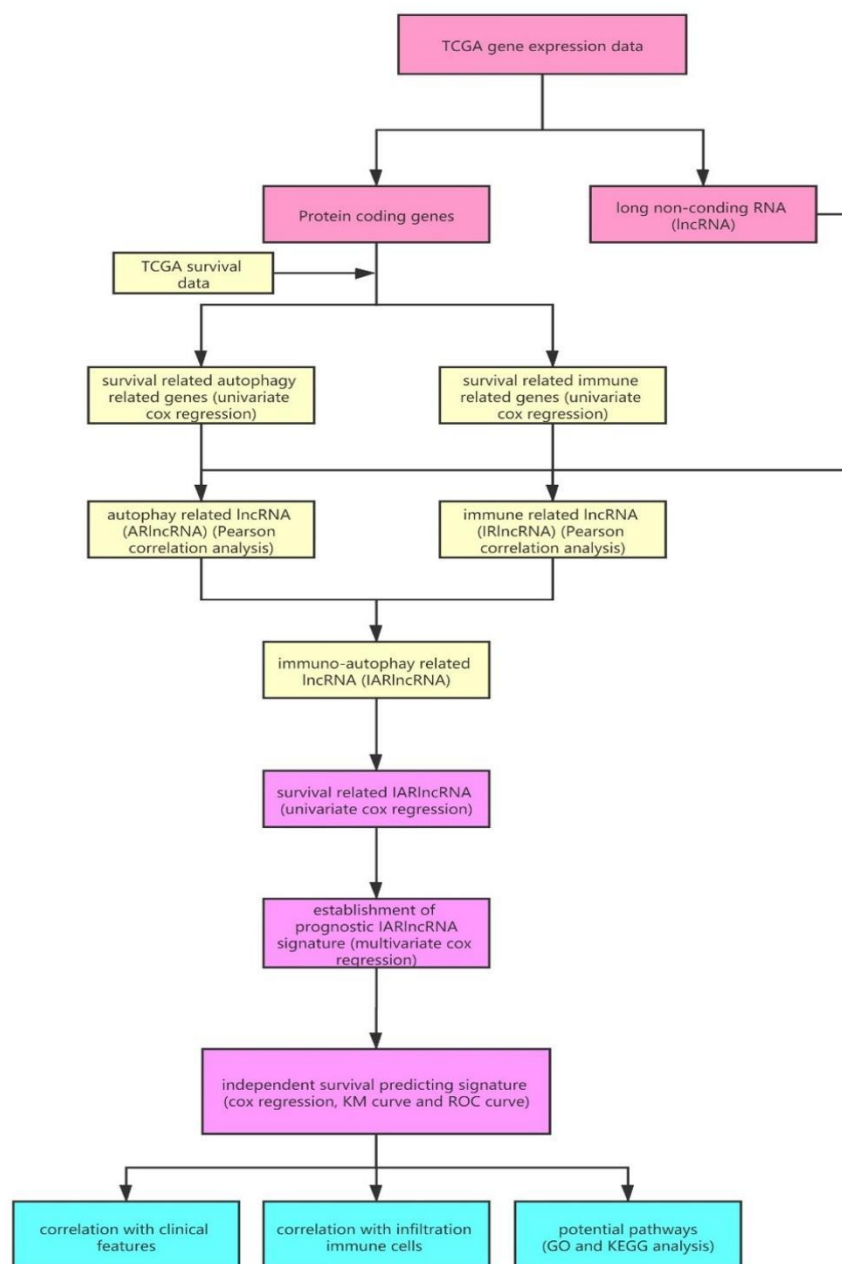

Supplementary Figure S2: Percentage of infiltration immune cells in patients

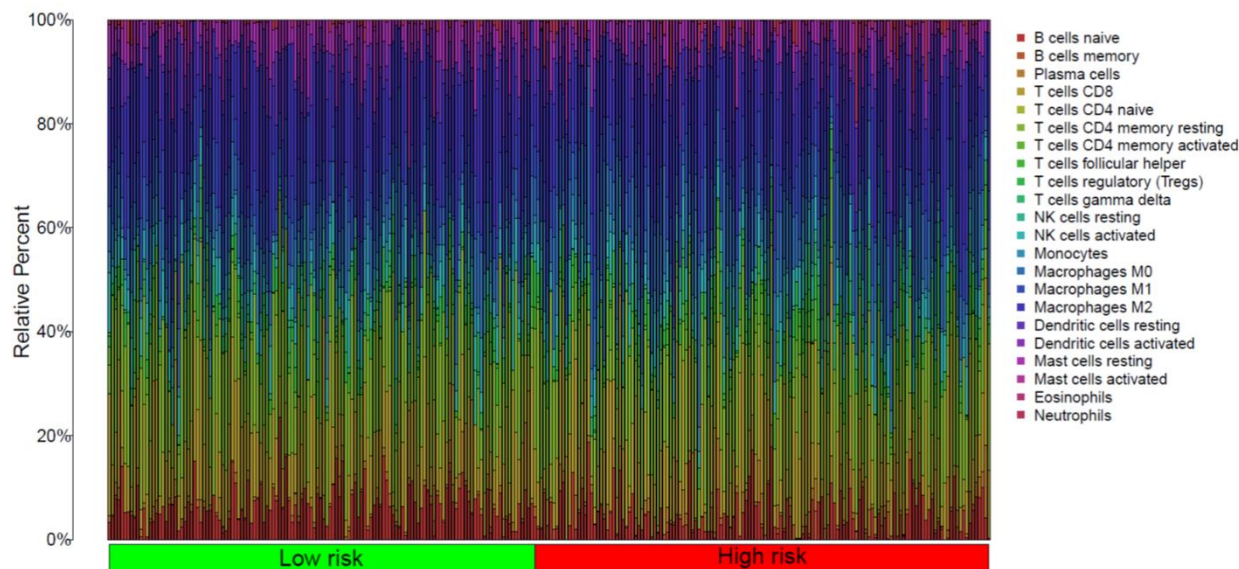

Supplementary Figure S3: GO analysis

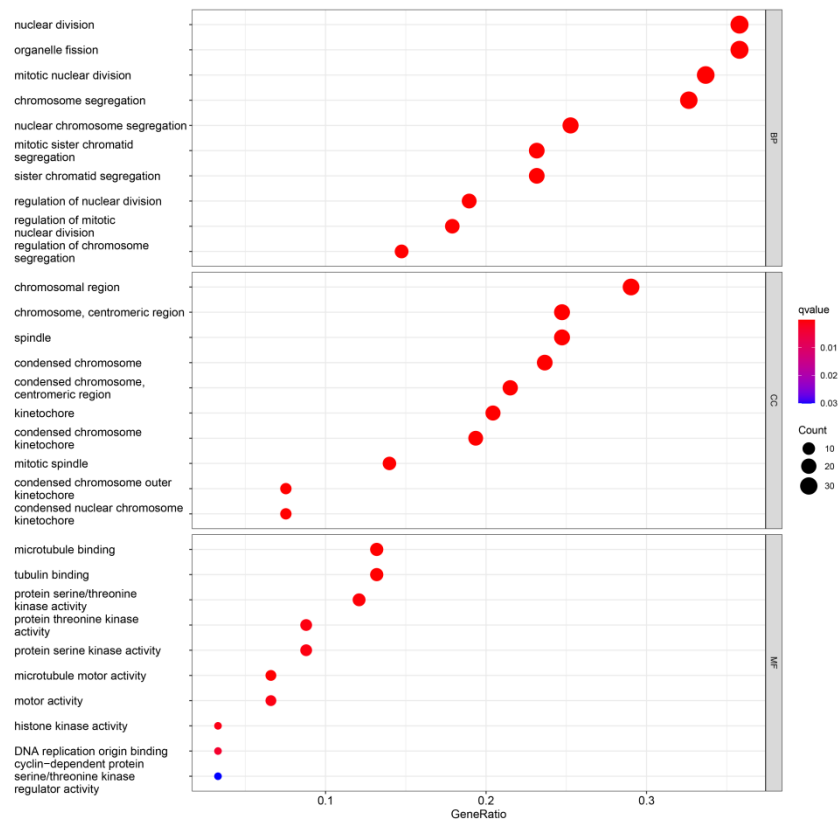

Supplement: s1 [file s1]
