# Supplementary material for: Immunoautophagy-Related Long Noncoding RNA (IAR-lncRNA) Signature Predicts Survival in Hepatocellular Carcinoma
Source: MDPI journal article supplement (doi:10.3390/biology10121301), 2021-12-09
Supplement: s1 [file s1]

| ARGene    | lncRNA      | cor          | pvalue   | relation |
|-----------|-------------|--------------|----------|----------|
| ATG5      | AL133338. 1 | 0.422288473  | 3.23E-17 | postive  |
| PRKCD     | FOXD2-AS1   | 0.445677785  | 3.26E-19 | postive  |
| IKBKE     | FOXD2-AS1   | 0.412022176  | 2.17E-16 | postive  |
| GABARAPL1 | FOXD2-AS1   | -0.461309498 | 1.24E-20 | negative |
| EIF4EBP1  | FOXD2-AS1   | 0.416901368  | 8.84E-17 | postive  |
| CHMP4B    | FOXD2-AS1   | 0.453473236  | 6.52E-20 | postive  |
| CDKN2A    | FOXD2-AS1   | 0.486848923  | 4.04E-23 | postive  |
| CAPN10    | FOXD2-AS1   | 0.493592446  | 8.22E-24 | postive  |
| BIRC5     | FOXD2-AS1   | 0.55224004   | 1.59E-30 | postive  |
| IKBKE     | PRKAG2-AS1  | -0.437624047 | 1.65E-18 | negative |
| BAK1      | AL031722. 1 | -0.44958911  | 1.46E-19 | negative |
| ATIC      | AL031722. 1 | -0.414338966 | 1.42E-16 | negative |
| CDKN2A    | AC008771. 1 | 0.410978646  | 2.62E-16 | postive  |
| BIRC5     | AC008771. 1 | 0.479288476  | 2.31E-22 | postive  |
| RAC1      | SNHG6       | 0.449012902  | 1.65E-19 | postive  |
| IKBKE     | SNHG6       | 0.404969789  | 7.74E-16 | postive  |
| FKBP1A    | SNHG6       | 0.543463848  | 1.95E-29 | postive  |
| CHMP4B    | SNHG6       | 0.427614006  | 1.17E-17 | postive  |
| BIRC5     | SNHG6       | 0.44545299   | 3.42E-19 | postive  |
| ATIC      | SNHG6       | 0.551197248  | 2.15E-30 | postive  |
| ATIC      | CASC19      | 0.423136264  | 2.75E-17 | postive  |
| RAC1      | AC015912. 3 | 0.412581968  | 1.96E-16 | postive  |
| GAPDH     | AC015912. 3 | 0.415214822  | 1.21E-16 | postive  |
| FKBP1A    | AC015912. 3 | 0.443937548  | 4.65E-19 | postive  |
| EIF4EBP1  | AC015912. 3 | 0.414738637  | 1.32E-16 | postive  |
| CHMP4B    | AC015912. 3 | 0.431849719  | 5.15E-18 | postive  |
| BIRC5     | AC015912. 3 | 0.408290072  | 4.27E-16 | postive  |
| ATIC      | AC015912. 3 | 0.402999753  | 1.10E-15 | postive  |
| MAPK3     | AL355574. 1 | 0.431330536  | 5.70E-18 | postive  |
| CAPN10    | AL355574. 1 | 0.461311101  | 1.24E-20 | postive  |
| ATIC      | AL355574. 1 | 0.423109231  | 2.76E-17 | postive  |
| IKBKE     | AC008549. 1 | -0.477252697 | 3.67E-22 | negative |
| CHMP4B    | AC008549. 1 | -0.438436712 | 1.41E-18 | negative |
| BAK1      | AC008549. 1 | -0.500799341 | 1.44E-24 | negative |
| RAC1      | AC023043. 3 | 0.423212937  | 2.71E-17 | postive  |
| EIF4EBP1  | AC023043. 3 | 0.436289198  | 2.15E-18 | postive  |
| DDIT3     | AC023043. 3 | 0.489967644  | 1.94E-23 | postive  |
| CHMP4B    | AC023043. 3 | 0.482284736  | 1.16E-22 | postive  |
| CAPN10    | AC023043. 3 | 0.453502286  | 6.48E-20 | postive  |
| BIRC5     | AC023043. 3 | 0.534596664  | 2.29E-28 | postive  |
| BAK1      | AC023043. 3 | 0.408508703  | 4.10E-16 | postive  |
| RAC1      | AC009686. 2 | 0.450151582  | 1.30E-19 | postive  |
| ATIC      | AC009686. 2 | 0.422408393  | 3.15E-17 | postive  |
| SPNS1     | WAC-AS1     | 0.403834999  | 9.47E-16 | postive  |
| PEA15     | WAC-AS1     | 0.462286636  | 1.00E-20 | postive  |
| NPC1      | WAC-AS1     | 0.460012686  | 1.63E-20 | postive  |

|           |             |              |          |          |
|-----------|-------------|--------------|----------|----------|
| MAPK3     | WAC-AS1     | 0.404463009  | 8.47E-16 | positive |
| GNAI3     | WAC-AS1     | 0.434831578  | 2.87E-18 | positive |
| CHMP4B    | WAC-AS1     | 0.430470772  | 6.73E-18 | positive |
| CAPN10    | WAC-AS1     | 0.424443594  | 2.14E-17 | positive |
| BAK1      | WAC-AS1     | 0.412953224  | 1.83E-16 | positive |
| ATG9A     | WAC-AS1     | 0.422480268  | 3.11E-17 | positive |
| ATG4B     | WAC-AS1     | 0.439396903  | 1.16E-18 | positive |
| SPNS1     | AC068580.1  | 0.568822632  | 1.12E-32 | positive |
| SH3GLB1   | AC068580.1  | 0.424562205  | 2.10E-17 | positive |
| NPC1      | AC068580.1  | 0.532554146  | 4.00E-28 | positive |
| RAC1      | AC018645.3  | 0.510779587  | 1.20E-25 | positive |
| RAB24     | AC092535.5  | 0.436098923  | 2.24E-18 | positive |
| CAPN10    | AC092535.5  | 0.519140718  | 1.41E-26 | positive |
| ATG4B     | AC092535.5  | 0.432322898  | 4.70E-18 | positive |
| SPNS1     | MID1IP1-AS1 | 0.490901714  | 1.56E-23 | positive |
| NPC1      | MID1IP1-AS1 | 0.44708305   | 2.45E-19 | positive |
| SPNS1     | ASB16-AS1   | 0.468020261  | 2.88E-21 | positive |
| MAPK3     | ASB16-AS1   | 0.422878963  | 2.88E-17 | positive |
| BIRC5     | ASB16-AS1   | 0.410455135  | 2.89E-16 | positive |
| PRKCD     | LINC02041   | 0.411244319  | 2.50E-16 | positive |
| CHMP4B    | LINC02041   | 0.422343333  | 3.19E-17 | positive |
| RAC1      | MAFG-DT     | 0.422024266  | 3.39E-17 | positive |
| MAPK3     | MAFG-DT     | 0.482139012  | 1.20E-22 | positive |
| GAPDH     | MAFG-DT     | 0.406608325  | 5.78E-16 | positive |
| FKBP1A    | MAFG-DT     | 0.411285058  | 2.48E-16 | positive |
| CHMP4B    | MAFG-DT     | 0.47228017   | 1.12E-21 | positive |
| BIRC5     | MAFG-DT     | 0.529115726  | 1.01E-27 | positive |
| ATIC      | MAFG-DT     | 0.452682376  | 7.69E-20 | positive |
| FKBP1A    | AL360181.1  | -0.425940479 | 1.61E-17 | negative |
| HDAC1     | AL050341.2  | 0.441356943  | 7.84E-19 | positive |
| GNAI3     | AL050341.2  | 0.465180642  | 5.35E-21 | positive |
| CAPN10    | AL050341.2  | 0.407700476  | 4.75E-16 | positive |
| BIRC5     | AL050341.2  | 0.405755681  | 6.73E-16 | positive |
| IKBKE     | AP001783.1  | -0.450771908 | 1.14E-19 | negative |
| HDAC1     | AP001783.1  | -0.44354411  | 5.04E-19 | negative |
| BAK1      | AP001783.1  | -0.401344004 | 1.47E-15 | negative |
| ATIC      | AP001783.1  | -0.444406068 | 4.23E-19 | negative |
| RAC1      | AL035461.2  | 0.475284215  | 5.73E-22 | positive |
| PRKCD     | AL035461.2  | 0.458154198  | 2.43E-20 | positive |
| MTMR14    | AL035461.2  | 0.419158087  | 5.81E-17 | positive |
| IKBKE     | AL035461.2  | 0.405617079  | 6.90E-16 | positive |
| HDAC1     | AL035461.2  | 0.401010588  | 1.56E-15 | positive |
| GABARAPL1 | AL035461.2  | -0.430650842 | 6.50E-18 | negative |
| FKBP1A    | AL035461.2  | 0.588057025  | 2.51E-35 | positive |
| EIF4EBP1  | AL035461.2  | 0.501189351  | 1.31E-24 | positive |
| CHMP4B    | AL035461.2  | 0.59501892   | 2.49E-36 | positive |
| CDKN2A    | AL035461.2  | 0.427752621  | 1.14E-17 | positive |

|          |            |              |          |          |
|----------|------------|--------------|----------|----------|
| CAPN10   | AL035461.2 | 0.558627126  | 2.44E-31 | positive |
| BIRC5    | AL035461.2 | 0.669770746  | 7.44E-49 | positive |
| ATIC     | AL035461.2 | 0.412142333  | 2.12E-16 | positive |
| ATG4B    | AL035461.2 | 0.574577805  | 1.89E-33 | positive |
| PEA15    | LINC01093  | -0.41314694  | 1.77E-16 | negative |
| HSP90AB1 | LINC01093  | -0.433964168 | 3.41E-18 | negative |
| GAPDH    | LINC01093  | -0.418114859 | 7.06E-17 | negative |
| ATIC     | LINC01093  | -0.528656757 | 1.14E-27 | negative |
| GAPDH    | AL445524.1 | 0.422374511  | 3.17E-17 | positive |
| CDKN2A   | AC106820.3 | 0.452484074  | 8.01E-20 | positive |
| BIRC5    | AC106820.3 | 0.462630716  | 9.30E-21 | positive |
| PRKCD    | LINC02381  | 0.411551988  | 2.36E-16 | positive |
| IKBKE    | LINC02381  | 0.418187594  | 6.96E-17 | positive |
| FKBP1A   | LINC02381  | 0.421654311  | 3.64E-17 | positive |
| CHMP4B   | LINC02381  | 0.400812675  | 1.62E-15 | positive |
| CAPN10   | LINC02381  | 0.429525765  | 8.09E-18 | positive |
| ATG4B    | LINC02381  | 0.428890162  | 9.14E-18 | positive |
| RAC1     | AC026740.1 | 0.420540574  | 4.48E-17 | positive |
| IKBKE    | AC026740.1 | 0.440311375  | 9.67E-19 | positive |
| CAPN10   | AC026740.1 | 0.439422352  | 1.15E-18 | positive |
| GNAI3    | Z95115.1   | 0.406948346  | 5.43E-16 | positive |
| BIRC5    | Z95115.1   | 0.422035526  | 3.38E-17 | positive |
| RAC1     | AP001505.1 | 0.463034194  | 8.53E-21 | positive |
| FKBP1A   | AP001505.1 | 0.464969919  | 5.61E-21 | positive |
| EIF4EBP1 | AP001505.1 | 0.46370502   | 7.38E-21 | positive |
| CHMP4B   | AP001505.1 | 0.482345503  | 1.15E-22 | positive |
| CAPN10   | AP001505.1 | 0.465320394  | 5.19E-21 | positive |
| BIRC5    | AP001505.1 | 0.532036523  | 4.60E-28 | positive |
| ATIC     | AP001505.1 | 0.414257313  | 1.44E-16 | positive |
| ATG4B    | AP001505.1 | 0.523480667  | 4.53E-27 | positive |
| RAB24    | MELTF-AS1  | 0.413265347  | 1.73E-16 | positive |
| PRKCD    | MELTF-AS1  | 0.48279181   | 1.04E-22 | positive |
| MAPK3    | MELTF-AS1  | 0.42428325   | 2.21E-17 | positive |
| IKBKE    | MELTF-AS1  | 0.469299404  | 2.17E-21 | positive |
| HDAC1    | MELTF-AS1  | 0.430559303  | 6.62E-18 | positive |
| FKBP1A   | MELTF-AS1  | 0.407228869  | 5.17E-16 | positive |
| CHMP4B   | MELTF-AS1  | 0.536040927  | 1.54E-28 | positive |
| CAPN10   | MELTF-AS1  | 0.556496596  | 4.57E-31 | positive |
| BIRC5    | MELTF-AS1  | 0.575060569  | 1.62E-33 | positive |
| BAK1     | MELTF-AS1  | 0.469735688  | 1.97E-21 | positive |
| ATG4B    | MELTF-AS1  | 0.546912683  | 7.35E-30 | positive |
| PEA15    | DCXR-DT    | -0.412888395 | 1.85E-16 | negative |
| IKBKE    | DCXR-DT    | -0.511815604 | 9.25E-26 | negative |
| BAK1     | DCXR-DT    | -0.477807519 | 3.24E-22 | negative |
| SPNS1    | AC080112.1 | 0.434933529  | 2.81E-18 | positive |
| RAC1     | SNHG17     | 0.4401543    | 9.97E-19 | positive |
| RAB24    | SNHG17     | 0.455093837  | 4.64E-20 | positive |

|          |             |              |          |          |
|----------|-------------|--------------|----------|----------|
| FKBP1A   | SNHG17      | 0.537671285  | 9.83E-29 | positive |
| DDIT3    | SNHG17      | 0.429068918  | 8.83E-18 | positive |
| CHMP4B   | SNHG17      | 0.52612122   | 2.25E-27 | positive |
| CAPN10   | SNHG17      | 0.508904999  | 1.93E-25 | positive |
| BIRC5    | SNHG17      | 0.401745838  | 1.37E-15 | positive |
| BAK1     | SNHG17      | 0.403872375  | 9.41E-16 | positive |
| ATIC     | SNHG17      | 0.551660322  | 1.88E-30 | positive |
| ATG4B    | SNHG17      | 0.51557225   | 3.55E-26 | positive |
| SPNS1    | RAB11B-AS1  | -0.459137293 | 1.97E-20 | negative |
| SH3GLB1  | RAB11B-AS1  | -0.419831224 | 5.12E-17 | negative |
| PEA15    | RAB11B-AS1  | -0.413125619 | 1.77E-16 | negative |
| NPC1     | RAB11B-AS1  | -0.479065693 | 2.43E-22 | negative |
| ATG3     | RAB11B-AS1  | -0.410067042 | 3.10E-16 | negative |
| IKBKE    | AC012313.9  | -0.478754553 | 2.61E-22 | negative |
| CHMP4B   | AC012313.9  | -0.400844761 | 1.61E-15 | negative |
| BAK1     | AC012313.9  | -0.457718385 | 2.66E-20 | negative |
| ATIC     | AC012313.9  | -0.400773688 | 1.63E-15 | negative |
| IKBKE    | LINC02754   | -0.487663894 | 3.34E-23 | negative |
| BAK1     | LINC02754   | -0.42216995  | 3.30E-17 | negative |
| SH3GLB1  | ZSCAN16-AS1 | -0.456658752 | 3.33E-20 | negative |
| CAPN10   | LINC00685   | 0.452933621  | 7.30E-20 | positive |
| ATG4B    | LINC00685   | 0.507335892  | 2.86E-25 | positive |
| CDKN2A   | AL441992.1  | 0.448969702  | 1.66E-19 | positive |
| PRKCD    | TMPO-AS1    | 0.407081335  | 5.31E-16 | positive |
| CDKN2A   | TMPO-AS1    | 0.429033891  | 8.89E-18 | positive |
| BIRC5    | TMPO-AS1    | 0.64375773   | 4.24E-44 | positive |
| IKBKE    | LINC00623   | 0.444219569  | 4.39E-19 | positive |
| FKBP1A   | LINC00623   | 0.454691216  | 5.05E-20 | positive |
| CHMP4B   | LINC00623   | 0.418095182  | 7.08E-17 | positive |
| FKBP1A   | EP300-AS1   | -0.432483982 | 4.55E-18 | negative |
| RAC1     | GAS5        | 0.417395788  | 8.07E-17 | positive |
| RAB24    | GAS5        | 0.49629812   | 4.29E-24 | positive |
| HSP90AB1 | GAS5        | 0.412932531  | 1.84E-16 | positive |
| FKBP1A   | GAS5        | 0.452811395  | 7.48E-20 | positive |
| CAPN10   | GAS5        | 0.450474556  | 1.22E-19 | positive |
| ATIC     | GAS5        | 0.622613781  | 1.47E-40 | positive |
| ATG4B    | GAS5        | 0.428618513  | 9.64E-18 | positive |
| CHMP4B   | LINC01836   | 0.435250443  | 2.64E-18 | positive |
| RAC1     | AC138207.5  | 0.455313753  | 4.43E-20 | positive |
| MAPK3    | AC138207.5  | 0.41217818   | 2.11E-16 | positive |
| IKBKE    | AC138207.5  | 0.537392662  | 1.06E-28 | positive |
| FKBP1A   | AC138207.5  | 0.524067999  | 3.88E-27 | positive |
| CHMP4B   | AC138207.5  | 0.46954791   | 2.06E-21 | positive |
| BAK1     | AC138207.5  | 0.417641466  | 7.71E-17 | positive |
| ATG7     | AC138207.5  | 0.477276537  | 3.65E-22 | positive |
| RAC1     | MIR4435-2HG | 0.569713618  | 8.55E-33 | positive |
| MAPK3    | MIR4435-2HG | 0.44696468   | 2.51E-19 | positive |

|          |             |              |          |          |
|----------|-------------|--------------|----------|----------|
| IKBKE    | MIR4435-2HG | 0.512259875  | 8.27E-26 | positive |
| GAPDH    | MIR4435-2HG | 0.457029873  | 3.08E-20 | positive |
| FKBP1A   | MIR4435-2HG | 0.605509329  | 6.87E-38 | positive |
| CHMP4B   | MIR4435-2HG | 0.572765933  | 3.32E-33 | positive |
| CAPN10   | MIR4435-2HG | 0.459379289  | 1.87E-20 | positive |
| BAK1     | MIR4435-2HG | 0.477262717  | 3.66E-22 | positive |
| ATIC     | MIR4435-2HG | 0.523271215  | 4.79E-27 | positive |
| ATG7     | MIR4435-2HG | 0.412525981  | 1.98E-16 | positive |
| CAPN10   | THAP9-AS1   | 0.409976877  | 3.15E-16 | positive |
| FKBP1A   | LINC02037   | -0.464851622 | 5.75E-21 | negative |
| RAB24    | LMNTD2-AS1  | 0.416646987  | 9.27E-17 | positive |
| CAPN10   | LMNTD2-AS1  | 0.472440821  | 1.08E-21 | positive |
| ATG4B    | LMNTD2-AS1  | 0.432144752  | 4.86E-18 | positive |
| IKBKE    | PCED1B-AS1  | 0.560396787  | 1.44E-31 | positive |
| FKBP1A   | PCED1B-AS1  | 0.485380497  | 5.69E-23 | positive |
| ATG7     | PCED1B-AS1  | 0.423484993  | 2.57E-17 | positive |
| HSP90AB1 | LINC02428   | -0.410384742 | 2.92E-16 | negative |
| SPNS1    | AC005288.1  | 0.693386413  | 1.30E-53 | positive |
| SH3GLB1  | AC005288.1  | 0.622176189  | 1.72E-40 | positive |
| RHEB     | AC005288.1  | 0.427139059  | 1.28E-17 | positive |
| NPC1     | AC005288.1  | 0.595729509  | 1.96E-36 | positive |
| GNAI3    | AC005288.1  | 0.60710067   | 3.94E-38 | positive |
| ATG3     | AC005288.1  | 0.475430246  | 5.54E-22 | positive |
| NPC1     | AC005332.6  | 0.439168744  | 1.21E-18 | positive |
| ATG4B    | BAIAP2-DT   | 0.402494592  | 1.20E-15 | positive |
| EIF4EBP1 | AC093673.1  | 0.443288032  | 5.31E-19 | positive |
| CHMP4B   | AC093673.1  | 0.474526193  | 6.79E-22 | positive |
| BIRC5    | AC093673.1  | 0.401528852  | 1.42E-15 | positive |
| SH3GLB1  | NORAD       | 0.45662417   | 3.36E-20 | positive |
| NPC1     | NORAD       | 0.410350052  | 2.94E-16 | positive |
| GNAI3    | NORAD       | 0.45749809   | 2.79E-20 | positive |
| SPNS1    | AL450326.1  | 0.465184973  | 5.35E-21 | positive |
| RAB24    | ARRDC1-AS1  | 0.418288117  | 6.83E-17 | positive |
| CDKN2A   | ARRDC1-AS1  | 0.442875744  | 5.77E-19 | positive |
| CAPN10   | ARRDC1-AS1  | 0.465717392  | 4.76E-21 | positive |
| BIRC5    | ARRDC1-AS1  | 0.423759515  | 2.44E-17 | positive |
| ATG4B    | ARRDC1-AS1  | 0.455280658  | 4.46E-20 | positive |
| RAC1     | SNHG7       | 0.414164179  | 1.47E-16 | positive |
| RAB24    | SNHG7       | 0.544956366  | 1.28E-29 | positive |
| PRKCD    | SNHG7       | 0.439044859  | 1.25E-18 | positive |
| FKBP1A   | SNHG7       | 0.473968582  | 7.69E-22 | positive |
| CHMP4B   | SNHG7       | 0.46598003   | 4.50E-21 | positive |
| CAPN10   | SNHG7       | 0.548064035  | 5.29E-30 | positive |
| BIRC5    | SNHG7       | 0.479168302  | 2.38E-22 | positive |
| ATIC     | SNHG7       | 0.526342838  | 2.12E-27 | positive |
| ATG4B    | SNHG7       | 0.548984666  | 4.06E-30 | positive |
| RAB24    | BACE1-AS    | 0.509938663  | 1.49E-25 | positive |

|         |             |              |          |          |
|---------|-------------|--------------|----------|----------|
| PRKCD   | BACE1-AS    | 0.480355755  | 1.81E-22 | positive |
| PEA15   | BACE1-AS    | 0.423206788  | 2.71E-17 | positive |
| NPC1    | BACE1-AS    | 0.409577064  | 3.38E-16 | positive |
| IKBKE   | BACE1-AS    | 0.462206069  | 1.02E-20 | positive |
| HDAC1   | BACE1-AS    | 0.455564281  | 4.20E-20 | positive |
| CHMP4B  | BACE1-AS    | 0.408974227  | 3.77E-16 | positive |
| CAPN10  | BACE1-AS    | 0.629742744  | 1.01E-41 | positive |
| BIRC5   | BACE1-AS    | 0.447077662  | 2.45E-19 | positive |
| BAK1    | BACE1-AS    | 0.422464822  | 3.12E-17 | positive |
| ATIC    | BACE1-AS    | 0.46778208   | 3.03E-21 | positive |
| ATG9A   | BACE1-AS    | 0.449337496  | 1.54E-19 | positive |
| ATG4B   | BACE1-AS    | 0.576966707  | 8.91E-34 | positive |
| SH3GLB1 | AL355488.1  | 0.424475332  | 2.13E-17 | positive |
| RAB24   | AL355488.1  | 0.466137984  | 4.35E-21 | positive |
| PRKCD   | AL355488.1  | 0.458706319  | 2.16E-20 | positive |
| NPC1    | AL355488.1  | 0.457974694  | 2.52E-20 | positive |
| IKBKE   | AL355488.1  | 0.417580215  | 7.79E-17 | positive |
| HDAC1   | AL355488.1  | 0.414356457  | 1.41E-16 | positive |
| GNAI3   | AL355488.1  | 0.49497366   | 5.90E-24 | positive |
| CAPN10  | AL355488.1  | 0.603645738  | 1.31E-37 | positive |
| BIRC5   | AL355488.1  | 0.491111244  | 1.48E-23 | positive |
| ATG4B   | AL355488.1  | 0.527451618  | 1.58E-27 | positive |
| IKBKE   | AC133552.5  | -0.527316801 | 1.64E-27 | negative |
| SPNS1   | AC068580.3  | 0.497141513  | 3.50E-24 | positive |
| NPC1    | AC068580.3  | 0.467724775  | 3.07E-21 | positive |
| RAB24   | PTOV1-AS2   | 0.458604122  | 2.21E-20 | positive |
| PRKCD   | PTOV1-AS2   | 0.436023276  | 2.27E-18 | positive |
| NPC1    | PTOV1-AS2   | 0.465224241  | 5.30E-21 | positive |
| HDAC1   | PTOV1-AS2   | 0.438894672  | 1.28E-18 | positive |
| CAPN10  | PTOV1-AS2   | 0.607090676  | 3.95E-38 | positive |
| ATG4B   | PTOV1-AS2   | 0.529610449  | 8.86E-28 | positive |
| CAPN10  | PSMA3-AS1   | 0.409378172  | 3.51E-16 | positive |
| ATG4B   | PSMA3-AS1   | 0.446072215  | 3.01E-19 | positive |
| BIRC5   | AL031673.1  | 0.400070765  | 1.84E-15 | positive |
| RAC1    | PRKAR1B-AS1 | 0.417798132  | 7.48E-17 | positive |
| IKBKE   | PRKAR1B-AS1 | 0.45654609   | 3.41E-20 | positive |
| FKBP1A  | PRKAR1B-AS1 | 0.50319918   | 7.98E-25 | positive |
| CHMP4B  | PRKAR1B-AS1 | 0.447861564  | 2.09E-19 | positive |
| IKBKE   | HNF4A-AS1   | -0.461716856 | 1.13E-20 | negative |
| HDAC1   | HNF4A-AS1   | -0.409487116 | 3.44E-16 | negative |
| BAK1    | HNF4A-AS1   | -0.459323417 | 1.89E-20 | negative |
| SPNS1   | FGD5-AS1    | 0.587192266  | 3.34E-35 | positive |
| SH3GLB1 | FGD5-AS1    | 0.568570735  | 1.21E-32 | positive |
| RHEB    | FGD5-AS1    | 0.415920315  | 1.06E-16 | positive |
| PRKCD   | FGD5-AS1    | 0.400133201  | 1.82E-15 | positive |
| NPC1    | FGD5-AS1    | 0.561827517  | 9.39E-32 | positive |
| GNAI3   | FGD5-AS1    | 0.566456913  | 2.32E-32 | positive |

|           |             |              |          |          |
|-----------|-------------|--------------|----------|----------|
| ATG3      | FGD5-AS1    | 0.427135398  | 1.28E-17 | positive |
| IKBKE     | AC009005.1  | 0.426772136  | 1.37E-17 | positive |
| GABARAPL1 | AC009005.1  | -0.406230264 | 6.18E-16 | negative |
| CAPN10    | AC009005.1  | 0.426818893  | 1.36E-17 | positive |
| BIRC5     | AC009005.1  | 0.520870719  | 8.99E-27 | positive |
| BAK1      | AC009005.1  | 0.406005054  | 6.43E-16 | positive |
| ATIC      | AC009005.1  | 0.418616321  | 6.43E-17 | positive |
| NPC1      | AC008735.2  | 0.50387286   | 6.76E-25 | positive |
| CAPN10    | AC008735.2  | 0.497956765  | 2.87E-24 | positive |
| ATG4B     | AC008735.2  | 0.439555605  | 1.12E-18 | positive |
| PEA15     | LINC01348   | -0.416229901 | 1.00E-16 | negative |
| PEA15     | AC010336.2  | -0.43199471  | 5.01E-18 | negative |
| IKBKE     | AC010336.2  | -0.585006279 | 6.80E-35 | negative |
| HDAC1     | AC010336.2  | -0.420450583 | 4.56E-17 | negative |
| CAPN10    | AC010336.2  | -0.404313563 | 8.70E-16 | negative |
| BAK1      | AC010336.2  | -0.493404143 | 8.59E-24 | negative |
| ATIC      | AC010336.2  | -0.423410869 | 2.61E-17 | negative |
| IKBKE     | AC012640.2  | -0.420998439 | 4.11E-17 | negative |
| BIRC5     | SNHG25      | 0.442092745  | 6.76E-19 | positive |
| ATG4B     | SNHG25      | 0.439230544  | 1.20E-18 | positive |
| SPNS1     | ANKRD10-IT1 | 0.456602317  | 3.37E-20 | positive |
| SH3GLB1   | ANKRD10-IT1 | 0.465081377  | 5.47E-21 | positive |
| NPC1      | ANKRD10-IT1 | 0.468134978  | 2.81E-21 | positive |
| GNAI3     | ANKRD10-IT1 | 0.421446943  | 3.78E-17 | positive |
| RAB24     | ASMTL-AS1   | 0.441543632  | 7.55E-19 | positive |
| RAC1      | AGAP2-AS1   | 0.419101908  | 5.87E-17 | positive |
| FKBP1A    | AGAP2-AS1   | 0.44266167   | 6.02E-19 | positive |
| CHMP4B    | AGAP2-AS1   | 0.466833577  | 3.73E-21 | positive |
| RAC1      | AC011468.1  | 0.448525113  | 1.82E-19 | positive |
| FKBP1A    | AC011468.1  | 0.436734818  | 1.97E-18 | positive |
| CHMP4B    | AC011468.1  | 0.476933028  | 3.95E-22 | positive |
| CAPN10    | AC011468.1  | 0.488697008  | 2.62E-23 | positive |
| ATG4B     | AC011468.1  | 0.550461605  | 2.66E-30 | positive |
| FKBP1A    | AC105105.2  | -0.403452032 | 1.01E-15 | negative |
| PEA15     | AC068338.2  | -0.419181556 | 5.78E-17 | negative |
| IKBKE     | AC068338.2  | -0.493494945 | 8.41E-24 | negative |
| BAK1      | AC068338.2  | -0.417686761 | 7.64E-17 | negative |
| SPNS1     | AC016888.1  | 0.703879486  | 7.09E-56 | positive |
| NPC1      | AC016888.1  | 0.473970047  | 7.69E-22 | positive |
| GNAI3     | AC016888.1  | 0.472668483  | 1.03E-21 | positive |
| SPNS1     | LINC00106   | 0.401259128  | 1.49E-15 | positive |
| RAC1      | GIHCG       | 0.422088779  | 3.35E-17 | positive |
| MTMR14    | GIHCG       | 0.482327415  | 1.15E-22 | positive |
| MAPK3     | GIHCG       | 0.424250142  | 2.22E-17 | positive |
| FKBP1A    | GIHCG       | 0.538134617  | 8.65E-29 | positive |
| CHMP4B    | GIHCG       | 0.489176221  | 2.34E-23 | positive |
| CDKN2A    | GIHCG       | 0.469299005  | 2.17E-21 | positive |

|          |            |              |          |          |
|----------|------------|--------------|----------|----------|
| BIRC5    | GIHCG      | 0.526111796  | 2.26E-27 | positive |
| ATIC     | GIHCG      | 0.444457358  | 4.19E-19 | positive |
| ATG4B    | GIHCG      | 0.427928568  | 1.10E-17 | positive |
| BIRC5    | PIK3CD-AS2 | 0.429142709  | 8.71E-18 | positive |
| ATIC     | PIK3CD-AS2 | 0.414878349  | 1.29E-16 | positive |
| PRKCD    | AC004862.1 | -0.402752275 | 1.15E-15 | negative |
| IKBKE    | AC004862.1 | -0.447117949 | 2.43E-19 | negative |
| BAK1     | AC004862.1 | -0.412172336 | 2.11E-16 | negative |
| SPNS1    | EBLN3P     | 0.4374889    | 1.70E-18 | positive |
| SH3GLB1  | EBLN3P     | 0.551609447  | 1.91E-30 | positive |
| NPC1     | EBLN3P     | 0.412862575  | 1.86E-16 | positive |
| GNAI3    | EBLN3P     | 0.47928305   | 2.32E-22 | positive |
| BIRC5    | CEBPA-DT   | 0.410923424  | 2.65E-16 | positive |
| IKBKE    | AL049840.5 | 0.417496941  | 7.92E-17 | positive |
| FKBP1A   | AL049840.5 | 0.489696514  | 2.07E-23 | positive |
| CAPN10   | AL049840.5 | 0.538330522  | 8.19E-29 | positive |
| ATIC     | AL049840.5 | 0.458269225  | 2.37E-20 | positive |
| ATG4B    | AL049840.5 | 0.54596432   | 9.62E-30 | positive |
| PRKCD    | AC239800.2 | -0.477667074 | 3.34E-22 | negative |
| NPC1     | AC239800.2 | -0.420960516 | 4.14E-17 | negative |
| IKBKE    | AC239800.2 | -0.400542668 | 1.69E-15 | negative |
| IKBKE    | AL355102.4 | 0.50672501   | 3.33E-25 | positive |
| CHMP4B   | AL355102.4 | 0.405690008  | 6.81E-16 | positive |
| CAPN10   | AL355102.4 | 0.44030884   | 9.67E-19 | positive |
| BAK1     | AL355102.4 | 0.445580093  | 3.33E-19 | positive |
| SPNS1    | AC012065.2 | -0.438814148 | 1.30E-18 | negative |
| SPNS1    | AC005332.5 | 0.417996557  | 7.21E-17 | positive |
| RHEB     | AC005332.5 | 0.412926484  | 1.84E-16 | positive |
| RAB24    | AC005332.5 | 0.515095372  | 4.01E-26 | positive |
| NPC1     | AC005332.5 | 0.501520007  | 1.21E-24 | positive |
| CAPN10   | AC005332.5 | 0.516169324  | 3.04E-26 | positive |
| BIRC5    | AC005332.5 | 0.508331188  | 2.23E-25 | positive |
| BAK1     | AC005332.5 | 0.406153591  | 6.27E-16 | positive |
| ATG9A    | AC005332.5 | 0.401526941  | 1.42E-15 | positive |
| ATG4B    | AC005332.5 | 0.418555802  | 6.50E-17 | positive |
| GAPDH    | MIR21OHG   | 0.405550101  | 6.98E-16 | positive |
| EIF4EBP1 | MIR21OHG   | 0.41169558   | 2.30E-16 | positive |
| DDIT3    | MIR21OHG   | 0.420418022  | 4.59E-17 | positive |
| CHMP4B   | MIR21OHG   | 0.428466171  | 9.92E-18 | positive |
| CAPN10   | MIR21OHG   | 0.444747541  | 3.95E-19 | positive |
| BIRC5    | MIR21OHG   | 0.498614457  | 2.45E-24 | positive |
| CHMP4B   | SNHG11     | 0.430555558  | 6.62E-18 | positive |
| CAPN10   | SNHG11     | 0.476036351  | 4.83E-22 | positive |
| ATG4B    | SNHG11     | 0.517771556  | 2.01E-26 | positive |
| IKBKE    | AP002807.1 | 0.414518793  | 1.37E-16 | positive |
| HDAC1    | AP002807.1 | 0.427825483  | 1.12E-17 | positive |
| CAPN10   | AP002807.1 | 0.518982535  | 1.47E-26 | positive |



|          |             |              |          |          |
|----------|-------------|--------------|----------|----------|
| ATG4B    | AP002807.1  | 0.47802835   | 3.08E-22 | positive |
| RAB24    | AP003352.1  | 0.454598661  | 5.15E-20 | positive |
| FKBP1A   | AP003352.1  | 0.446898355  | 2.54E-19 | positive |
| CAPN10   | AP003352.1  | 0.458517025  | 2.25E-20 | positive |
| ATIC     | AP003352.1  | 0.412009703  | 2.17E-16 | positive |
| ATG4B    | AP003352.1  | 0.490236152  | 1.82E-23 | positive |
| RAC1     | TMEM220-AS1 | -0.464466562 | 6.25E-21 | negative |
| MAPK3    | TMEM220-AS1 | -0.467987587 | 2.90E-21 | negative |
| GAPDH    | TMEM220-AS1 | -0.436692017 | 1.99E-18 | negative |
| FKBP1A   | TMEM220-AS1 | -0.531609671 | 5.16E-28 | negative |
| CHMP4B   | TMEM220-AS1 | -0.55130328  | 2.08E-30 | negative |
| CAPN10   | TMEM220-AS1 | -0.435308539 | 2.61E-18 | negative |
| BIRC5    | TMEM220-AS1 | -0.459366744 | 1.87E-20 | negative |
| BAK1     | TMEM220-AS1 | -0.505835793 | 4.15E-25 | negative |
| ATIC     | TMEM220-AS1 | -0.454095717 | 5.72E-20 | negative |
| RAC1     | AC073896.4  | 0.502947588  | 8.49E-25 | positive |
| FKBP1A   | AC073896.4  | 0.510498446  | 1.29E-25 | positive |
| EIF4EBP1 | AC073896.4  | 0.508995398  | 1.89E-25 | positive |
| DDIT3    | AC073896.4  | 0.410281123  | 2.98E-16 | positive |
| CHMP4B   | AC073896.4  | 0.517571864  | 2.12E-26 | positive |
| CAPN10   | AC073896.4  | 0.455094578  | 4.64E-20 | positive |
| BIRC5    | AC073896.4  | 0.454731421  | 5.00E-20 | positive |
| ATG4B    | AC073896.4  | 0.443751268  | 4.83E-19 | positive |
| NPC1     | AL139287.1  | 0.408387728  | 4.19E-16 | positive |
| HDAC1    | AL139287.1  | 0.481236973  | 1.48E-22 | positive |
| CAPN10   | AL139287.1  | 0.53230397   | 4.28E-28 | positive |
| ATG4B    | AL139287.1  | 0.51066724   | 1.24E-25 | positive |
| IKBKE    | PELATON     | 0.423525116  | 2.55E-17 | positive |
| CHMP4B   | PELATON     | 0.42948148   | 8.16E-18 | positive |
| SQSTM1   | AP003119.1  | 0.463178009  | 8.27E-21 | positive |
| SPNS1    | AC099850.3  | 0.619153432  | 5.25E-40 | positive |
| SH3GLB1  | AC099850.3  | 0.526794253  | 1.88E-27 | positive |
| RHEB     | AC099850.3  | 0.47550553   | 5.45E-22 | positive |
| PRKCD    | AC099850.3  | 0.592187685  | 6.42E-36 | positive |
| PEA15    | AC099850.3  | 0.491867782  | 1.24E-23 | positive |
| NPC1     | AC099850.3  | 0.644631133  | 2.99E-44 | positive |
| MAPK3    | AC099850.3  | 0.480430568  | 1.78E-22 | positive |
| IKBKE    | AC099850.3  | 0.476799214  | 4.07E-22 | positive |
| HSP90AB1 | AC099850.3  | 0.417348764  | 8.14E-17 | positive |
| HDAC1    | AC099850.3  | 0.53535083   | 1.86E-28 | positive |
| GNAI3    | AC099850.3  | 0.58968993   | 1.47E-35 | positive |
| EIF2S1   | AC099850.3  | 0.4038782    | 9.40E-16 | positive |
| CHMP4B   | AC099850.3  | 0.418618837  | 6.42E-17 | positive |
| CAPN10   | AC099850.3  | 0.440210158  | 9.86E-19 | positive |
| BIRC5    | AC099850.3  | 0.70016809   | 4.60E-55 | positive |
| BAK1     | AC099850.3  | 0.530999452  | 6.09E-28 | positive |
| ATG7     | AC099850.3  | 0.435549067  | 2.49E-18 | positive |

|          |            |              |          |          |
|----------|------------|--------------|----------|----------|
| ATG5     | AC099850.3 | 0.425622532  | 1.71E-17 | positive |
| ATG3     | AC099850.3 | 0.526198508  | 2.21E-27 | positive |
| CAPN10   | AC012615.1 | 0.427160232  | 1.28E-17 | positive |
| ATG4B    | AC012615.1 | 0.465351064  | 5.16E-21 | positive |
| PRKCD    | AC010326.3 | 0.454600723  | 5.14E-20 | positive |
| IKBKE    | AC010326.3 | 0.447514624  | 2.24E-19 | positive |
| CHMP4B   | AC010326.3 | 0.439838669  | 1.06E-18 | positive |
| CAPN10   | AC010326.3 | 0.582209913  | 1.68E-34 | positive |
| BAK1     | AC010326.3 | 0.412391469  | 2.03E-16 | positive |
| ATG4B    | AC010326.3 | 0.602885698  | 1.71E-37 | positive |
| IKBKE    | LINC01871  | 0.403061713  | 1.09E-15 | positive |
| RAC1     | SNHG3      | 0.42414183   | 2.27E-17 | positive |
| RAB24    | SNHG3      | 0.534491012  | 2.36E-28 | positive |
| PRKCD    | SNHG3      | 0.469594905  | 2.03E-21 | positive |
| IKBKE    | SNHG3      | 0.439316848  | 1.18E-18 | positive |
| HDAC1    | SNHG3      | 0.587157342  | 3.37E-35 | positive |
| GAPDH    | SNHG3      | 0.425004907  | 1.93E-17 | positive |
| FKBP1A   | SNHG3      | 0.537894382  | 9.24E-29 | positive |
| CHMP4B   | SNHG3      | 0.527365044  | 1.62E-27 | positive |
| CAPN10   | SNHG3      | 0.578915316  | 4.81E-34 | positive |
| BIRC5    | SNHG3      | 0.532881126  | 3.66E-28 | positive |
| BAK1     | SNHG3      | 0.431302996  | 5.73E-18 | positive |
| ATIC     | SNHG3      | 0.577633407  | 7.22E-34 | positive |
| ATG4B    | SNHG3      | 0.543892161  | 1.73E-29 | positive |
| BIRC5    | TYMSOS     | 0.426735705  | 1.38E-17 | positive |
| PRKCD    | AC018904.1 | 0.428731975  | 9.43E-18 | positive |
| IKBKE    | AC018904.1 | 0.488360395  | 2.84E-23 | positive |
| CHMP4B   | AC018904.1 | 0.478574886  | 2.72E-22 | positive |
| CAPN10   | AC018904.1 | 0.572419453  | 3.70E-33 | positive |
| BAK1     | AC018904.1 | 0.448131862  | 1.97E-19 | positive |
| ATG4B    | AC018904.1 | 0.443723903  | 4.86E-19 | positive |
| RAC1     | AC005261.1 | 0.422694084  | 2.99E-17 | positive |
| IKBKE    | AC005261.1 | 0.400191818  | 1.80E-15 | positive |
| FKBP1A   | AC005261.1 | 0.418331147  | 6.78E-17 | positive |
| CHMP4B   | AC005261.1 | 0.457857026  | 2.59E-20 | positive |
| CAPN10   | AC005261.1 | 0.560142757  | 1.55E-31 | positive |
| BAK1     | AC005261.1 | 0.469516586  | 2.07E-21 | positive |
| ATG4B    | AC005261.1 | 0.556055379  | 5.21E-31 | positive |
| IKBKE    | AC016735.1 | 0.488681645  | 2.63E-23 | positive |
| ATG4B    | AC016735.1 | 0.413229085  | 1.74E-16 | positive |
| PRKCD    | AC068987.3 | 0.428439789  | 9.97E-18 | positive |
| MAPK3    | AP001065.3 | -0.479674945 | 2.12E-22 | negative |
| IKBKE    | AP001065.3 | -0.432707682 | 4.36E-18 | negative |
| HSP90AB1 | AP001065.3 | -0.463826887 | 7.18E-21 | negative |
| HDAC1    | AP001065.3 | -0.50289743  | 8.60E-25 | negative |
| GAPDH    | AP001065.3 | -0.441457917 | 7.68E-19 | negative |
| BAK1     | AP001065.3 | -0.484458979 | 7.05E-23 | negative |

|           |              |              |          |          |
|-----------|--------------|--------------|----------|----------|
| ATIC      | AP001065.3   | -0.449669893 | 1.44E-19 | negative |
| ATG7      | AP001065.3   | -0.442126486 | 6.71E-19 | negative |
| PRKCD     | LINC02362    | -0.401789267 | 1.36E-15 | negative |
| PEA15     | LINC02362    | -0.41060482  | 2.81E-16 | negative |
| HSP90AB1  | LINC02362    | -0.458043347 | 2.48E-20 | negative |
| HDAC1     | LINC02362    | -0.405175332 | 7.46E-16 | negative |
| BAK1      | LINC02362    | -0.439075863 | 1.24E-18 | negative |
| ATIC      | LINC02362    | -0.516272284 | 2.96E-26 | negative |
| BIRC5     | LINC01843    | 0.402557398  | 1.19E-15 | postive  |
| RAC1      | PVT1         | 0.402997393  | 1.10E-15 | postive  |
| FKBP1A    | PVT1         | 0.422049935  | 3.37E-17 | postive  |
| ATIC      | PVT1         | 0.49113303   | 1.47E-23 | postive  |
| RAB24     | EPB41L4A-AS1 | 0.499548197  | 1.95E-24 | postive  |
| ATIC      | EPB41L4A-AS1 | 0.481829487  | 1.29E-22 | postive  |
| HSP90AB1  | SNHG29       | 0.428893663  | 9.14E-18 | postive  |
| ATIC      | SNHG29       | 0.454532837  | 5.22E-20 | postive  |
| PEA15     | AL161668.4   | -0.436056634 | 2.25E-18 | negative |
| IKBKE     | AL161668.4   | -0.547660299 | 5.93E-30 | negative |
| BAK1      | AL161668.4   | -0.485950223 | 4.98E-23 | negative |
| ATIC      | AL161668.4   | -0.425654987 | 1.70E-17 | negative |
| RAC1      | SNHG12       | 0.517666534  | 2.07E-26 | postive  |
| RAB24     | SNHG12       | 0.585390406  | 6.00E-35 | postive  |
| PRKCD     | SNHG12       | 0.49326807   | 8.88E-24 | postive  |
| MAPK3     | SNHG12       | 0.406123605  | 6.30E-16 | postive  |
| IKBKE     | SNHG12       | 0.515068506  | 4.04E-26 | postive  |
| HDAC1     | SNHG12       | 0.547231856  | 6.71E-30 | postive  |
| FKBP1A    | SNHG12       | 0.548020603  | 5.35E-30 | postive  |
| CHMP4B    | SNHG12       | 0.604296598  | 1.05E-37 | postive  |
| CAPN10    | SNHG12       | 0.636733817  | 6.82E-43 | postive  |
| BIRC5     | SNHG12       | 0.475532338  | 5.42E-22 | postive  |
| BAK1      | SNHG12       | 0.473912686  | 7.79E-22 | postive  |
| ATIC      | SNHG12       | 0.465020962  | 5.54E-21 | postive  |
| ATG4B     | SNHG12       | 0.582481642  | 1.54E-34 | postive  |
| RAC1      | AL354872.1   | -0.42527236  | 1.83E-17 | negative |
| RAB24     | AL354872.1   | -0.416727058 | 9.13E-17 | negative |
| PRKCD     | AL354872.1   | -0.66946504  | 8.52E-49 | negative |
| PEA15     | AL354872.1   | -0.490700368 | 1.63E-23 | negative |
| NPC1      | AL354872.1   | -0.459312736 | 1.90E-20 | negative |
| MAPK3     | AL354872.1   | -0.502543114 | 9.38E-25 | negative |
| IKBKE     | AL354872.1   | -0.537959376 | 9.08E-29 | negative |
| HSP90AB1  | AL354872.1   | -0.462201035 | 1.02E-20 | negative |
| GABARAPL1 | AL354872.1   | 0.469188022  | 2.23E-21 | postive  |
| FKBP1A    | AL354872.1   | -0.404095025 | 9.04E-16 | negative |
| CHMP4B    | AL354872.1   | -0.442926897 | 5.71E-19 | negative |
| CAPN10    | AL354872.1   | -0.490483984 | 1.72E-23 | negative |
| BIRC5     | AL354872.1   | -0.427311791 | 1.24E-17 | negative |
| BAK1      | AL354872.1   | -0.507663776 | 2.63E-25 | negative |

|          |             |              |          |          |
|----------|-------------|--------------|----------|----------|
| ATIC     | AL354872.1  | -0.505830409 | 4.16E-25 | negative |
| ATG4B    | AL354872.1  | -0.444106246 | 4.50E-19 | negative |
| RAC1     | AC131009.3  | 0.426334638  | 1.49E-17 | positive |
| FKBP1A   | AC131009.3  | 0.401363254  | 1.47E-15 | positive |
| PRKCD    | B4GALT1-AS1 | -0.478572855 | 2.72E-22 | negative |
| MAPK3    | B4GALT1-AS1 | -0.403390661 | 1.02E-15 | negative |
| IKBKE    | B4GALT1-AS1 | -0.464824003 | 5.79E-21 | negative |
| HSP90AB1 | B4GALT1-AS1 | -0.414687939 | 1.33E-16 | negative |
| BIRC5    | B4GALT1-AS1 | -0.43705877  | 1.85E-18 | negative |
| BAK1     | B4GALT1-AS1 | -0.553384314 | 1.14E-30 | negative |
| PRKCD    | LAMA5-AS1   | -0.445529107 | 3.37E-19 | negative |
| IKBKE    | LAMA5-AS1   | -0.402425864 | 1.22E-15 | negative |
| FKBP1A   | AL390198.1  | 0.448729285  | 1.75E-19 | positive |
| SH3GLB1  | NRAV        | 0.473665695  | 8.23E-22 | positive |
| RAC1     | NRAV        | 0.523420656  | 4.60E-27 | positive |
| MAPK3    | NRAV        | 0.488872254  | 2.51E-23 | positive |
| IKBKE    | NRAV        | 0.447646461  | 2.18E-19 | positive |
| HDAC1    | NRAV        | 0.411401209  | 2.43E-16 | positive |
| GNAI3    | NRAV        | 0.494517371  | 6.58E-24 | positive |
| GAPDH    | NRAV        | 0.42022883   | 4.75E-17 | positive |
| FKBP1A   | NRAV        | 0.487809592  | 3.23E-23 | positive |
| CHMP4B   | NRAV        | 0.583655649  | 1.05E-34 | positive |
| CAPN10   | NRAV        | 0.508337794  | 2.22E-25 | positive |
| BIRC5    | NRAV        | 0.48309086   | 9.67E-23 | positive |
| BAK1     | NRAV        | 0.592287192  | 6.21E-36 | positive |
| ATIC     | NRAV        | 0.482714825  | 1.05E-22 | positive |
| ATG7     | NRAV        | 0.472164401  | 1.15E-21 | positive |
| CAPN10   | AC132872.1  | 0.434552803  | 3.03E-18 | positive |
| BIRC5    | AC132872.1  | 0.417920275  | 7.32E-17 | positive |
| ATG4B    | AC132872.1  | 0.428328517  | 1.02E-17 | positive |
| CAPN10   | SNHG10      | 0.445269209  | 3.55E-19 | positive |
| BIRC5    | SNHG10      | 0.457350945  | 2.88E-20 | positive |
| ATG4B    | SNHG10      | 0.516828474  | 2.57E-26 | positive |
| PEA15    | AL592494.1  | -0.440041663 | 1.02E-18 | negative |
| FKBP1A   | AC020978.4  | -0.443386107 | 5.20E-19 | negative |
| ATIC     | AC020978.4  | -0.517768449 | 2.01E-26 | negative |
| IKBKE    | AC036176.1  | -0.425798842 | 1.66E-17 | negative |
| BAK1     | AC036176.1  | -0.452745663 | 7.59E-20 | negative |
| IKBKE    | LINC02768   | -0.435966715 | 2.30E-18 | negative |
| HDAC1    | LINC02768   | -0.423626766 | 2.50E-17 | negative |
| FKBP1A   | LINC02768   | -0.416364214 | 9.77E-17 | negative |
| CHMP4B   | LINC02768   | -0.426954507 | 1.33E-17 | negative |
| SH3GLB1  | AC015917.2  | -0.446106036 | 2.99E-19 | negative |
| BAK1     | TUSC8       | -0.419673837 | 5.27E-17 | negative |
| CHMP4B   | AC008736.1  | 0.413639999  | 1.61E-16 | positive |
| PRKCD    | LINC01485   | -0.409379022 | 3.51E-16 | negative |
| PEA15    | LINC01485   | -0.420662837 | 4.38E-17 | negative |

|           |            |              |          |          |
|-----------|------------|--------------|----------|----------|
| IKBKE     | LINC01485  | -0.49506991  | 5.77E-24 | negative |
| HDAC1     | LINC01485  | -0.49865282  | 2.43E-24 | negative |
| CHMP4B    | LINC01485  | -0.425196372 | 1.86E-17 | negative |
| BAK1      | LINC01485  | -0.476651038 | 4.21E-22 | negative |
| ATG4B     | LINC01485  | -0.403477574 | 1.01E-15 | negative |
| RAC1      | AC026401.3 | 0.546829051  | 7.52E-30 | postive  |
| PRKCD     | AC026401.3 | 0.509512476  | 1.66E-25 | postive  |
| MTMR14    | AC026401.3 | 0.422433439  | 3.14E-17 | postive  |
| MAPK3     | AC026401.3 | 0.589381622  | 1.63E-35 | postive  |
| IKBKE     | AC026401.3 | 0.489149063  | 2.36E-23 | postive  |
| HDAC1     | AC026401.3 | 0.528530387  | 1.18E-27 | postive  |
| GAPDH     | AC026401.3 | 0.41566289   | 1.11E-16 | postive  |
| GABARAPL1 | AC026401.3 | -0.43432978  | 3.17E-18 | negative |
| FKBP1A    | AC026401.3 | 0.600961903  | 3.31E-37 | postive  |
| EIF4EBP1  | AC026401.3 | 0.537011922  | 1.18E-28 | postive  |
| CHMP4B    | AC026401.3 | 0.61712277   | 1.10E-39 | postive  |
| CDKN2A    | AC026401.3 | 0.604914487  | 8.45E-38 | postive  |
| CAPN10    | AC026401.3 | 0.560607688  | 1.35E-31 | postive  |
| BIRC5     | AC026401.3 | 0.727354187  | 2.54E-61 | postive  |
| BAK1      | AC026401.3 | 0.459350209  | 1.88E-20 | postive  |
| ATIC      | AC026401.3 | 0.471402248  | 1.36E-21 | postive  |
| ATG4B     | AC026401.3 | 0.472254719  | 1.13E-21 | postive  |
| FKBP1A    | AC112491.1 | 0.469782456  | 1.95E-21 | postive  |
| ATIC      | AC112491.1 | 0.413155241  | 1.76E-16 | postive  |
| RAC1      | AC083799.1 | 0.425621819  | 1.71E-17 | postive  |
| PRKCD     | AC083799.1 | 0.425357622  | 1.80E-17 | postive  |
| PEA15     | AC083799.1 | 0.421423332  | 3.80E-17 | postive  |
| IKBKE     | AC083799.1 | 0.476502112  | 4.35E-22 | postive  |
| HDAC1     | AC083799.1 | 0.465582178  | 4.91E-21 | postive  |
| FKBP1A    | AC083799.1 | 0.426563018  | 1.43E-17 | postive  |
| CHMP4B    | AC083799.1 | 0.426085936  | 1.57E-17 | postive  |
| CAPN10    | AC083799.1 | 0.428871904  | 9.18E-18 | postive  |
| ATIC      | AC083799.1 | 0.434635077  | 2.98E-18 | postive  |
| RAB24     | LINC00342  | 0.449772654  | 1.41E-19 | postive  |
| PRKCD     | LINC00342  | 0.440883828  | 8.62E-19 | postive  |
| IKBKE     | LINC00342  | 0.452950289  | 7.27E-20 | postive  |
| CHMP4B    | LINC00342  | 0.415030163  | 1.25E-16 | postive  |
| CAPN10    | LINC00342  | 0.589354988  | 1.64E-35 | postive  |
| ATG4B     | LINC00342  | 0.47311141   | 9.32E-22 | postive  |
| RAB24     | LINC00205  | 0.42389689   | 2.38E-17 | postive  |
| PRKCD     | LINC00205  | 0.482219422  | 1.18E-22 | postive  |
| PEA15     | LINC00205  | 0.418581767  | 6.47E-17 | postive  |
| NPC1      | LINC00205  | 0.401767592  | 1.37E-15 | postive  |
| MAPK3     | LINC00205  | 0.455067609  | 4.66E-20 | postive  |
| IKBKE     | LINC00205  | 0.452345739  | 8.25E-20 | postive  |
| HDAC1     | LINC00205  | 0.515483389  | 3.63E-26 | postive  |
| CHMP4B    | LINC00205  | 0.453024201  | 7.16E-20 | postive  |

|          |              |             |          |         |
|----------|--------------|-------------|----------|---------|
| CAPN10   | LINC00205    | 0.614442765 | 2.90E-39 | postive |
| BIRC5    | LINC00205    | 0.492270654 | 1.13E-23 | postive |
| BAK1     | LINC00205    | 0.42713603  | 1.28E-17 | postive |
| ATG9A    | LINC00205    | 0.424124785 | 2.28E-17 | postive |
| ATG4B    | LINC00205    | 0.594715608 | 2.76E-36 | postive |
| RAB24    | LINC00847    | 0.410300248 | 2.97E-16 | postive |
| SH3GLB1  | AC015922.2   | 0.442484821 | 6.24E-19 | postive |
| RAB24    | AC139100.2   | 0.405709173 | 6.78E-16 | postive |
| CAPN10   | AC139100.2   | 0.472918556 | 9.73E-22 | postive |
| ATG4B    | AC139100.2   | 0.489111085 | 2.38E-23 | postive |
| CDKN2A   | MROCK1       | 0.412967035 | 1.83E-16 | postive |
| RAC1     | MAPKAPK5-AS1 | 0.546782269 | 7.62E-30 | postive |
| RAB24    | MAPKAPK5-AS1 | 0.501514137 | 1.21E-24 | postive |
| PRKCD    | MAPKAPK5-AS1 | 0.405009089 | 7.69E-16 | postive |
| MTMR14   | MAPKAPK5-AS1 | 0.430422536 | 6.80E-18 | postive |
| MAPK3    | MAPKAPK5-AS1 | 0.442454331 | 6.28E-19 | postive |
| IKBKE    | MAPKAPK5-AS1 | 0.440158733 | 9.97E-19 | postive |
| HDAC1    | MAPKAPK5-AS1 | 0.40244948  | 1.21E-15 | postive |
| GAPDH    | MAPKAPK5-AS1 | 0.45527071  | 4.47E-20 | postive |
| FKBP1A   | MAPKAPK5-AS1 | 0.618849159 | 5.86E-40 | postive |
| EIF4EBP1 | MAPKAPK5-AS1 | 0.467926188 | 2.94E-21 | postive |
| DDIT3    | MAPKAPK5-AS1 | 0.549299501 | 3.71E-30 | postive |
| CHMP4B   | MAPKAPK5-AS1 | 0.609725968 | 1.56E-38 | postive |
| CAPN10   | MAPKAPK5-AS1 | 0.551405022 | 2.02E-30 | postive |
| BIRC5    | MAPKAPK5-AS1 | 0.558068278 | 2.88E-31 | postive |
| BAK1     | MAPKAPK5-AS1 | 0.465664006 | 4.82E-21 | postive |
| ATIC     | MAPKAPK5-AS1 | 0.574763897 | 1.78E-33 | postive |
| ATG7     | MAPKAPK5-AS1 | 0.41085427  | 2.68E-16 | postive |
| ATG4B    | MAPKAPK5-AS1 | 0.559713114 | 1.77E-31 | postive |
| IKBKE    | AC004687.1   | 0.48729961  | 3.64E-23 | postive |
| FKBP1A   | AC004687.1   | 0.408881663 | 3.84E-16 | postive |
| GAPDH    | PPP1R14B-AS1 | 0.525481985 | 2.67E-27 | postive |
| RAC1     | AL591895.1   | 0.447331969 | 2.33E-19 | postive |
| RAB24    | AL591895.1   | 0.419170117 | 5.79E-17 | postive |
| IKBKE    | AL591895.1   | 0.458684369 | 2.17E-20 | postive |
| FKBP1A   | AL591895.1   | 0.401774146 | 1.36E-15 | postive |
| CHMP4B   | AL591895.1   | 0.454289349 | 5.49E-20 | postive |
| CAPN10   | AL591895.1   | 0.551416496 | 2.02E-30 | postive |
| ATG4B    | AL591895.1   | 0.47180611  | 1.25E-21 | postive |
| BIRC5    | AL139384.1   | 0.439149897 | 1.22E-18 | postive |
| RAB24    | AL390728.5   | 0.444288798 | 4.33E-19 | postive |
| PRKCD    | AL390728.5   | 0.487593906 | 3.39E-23 | postive |
| PEA15    | AL390728.5   | 0.42470272  | 2.04E-17 | postive |
| NPC1     | AL390728.5   | 0.412960338 | 1.83E-16 | postive |
| IKBKE    | AL390728.5   | 0.48440699  | 7.13E-23 | postive |
| HDAC1    | AL390728.5   | 0.461009424 | 1.32E-20 | postive |
| CHMP4B   | AL390728.5   | 0.446772859 | 2.61E-19 | postive |

|         |            |              |          |          |
|---------|------------|--------------|----------|----------|
| CAPN10  | AL390728.5 | 0.624390481  | 7.58E-41 | positive |
| BAK1    | AL390728.5 | 0.430556209  | 6.62E-18 | positive |
| ATG4B   | AL390728.5 | 0.529484652  | 9.16E-28 | positive |
| PRKCD   | LINC00844  | -0.443363059 | 5.23E-19 | negative |
| IKBKE   | LINC00844  | -0.542876281 | 2.30E-29 | negative |
| HDAC1   | LINC00844  | -0.503290943 | 7.80E-25 | negative |
| CAPN10  | LINC00844  | -0.457017655 | 3.09E-20 | negative |
| BAK1    | LINC00844  | -0.527084946 | 1.74E-27 | negative |
| RAB24   | RUSC1-AS1  | 0.451204884  | 1.05E-19 | positive |
| NPC1    | RUSC1-AS1  | 0.41325392   | 1.73E-16 | positive |
| CAPN10  | RUSC1-AS1  | 0.471657357  | 1.29E-21 | positive |
| ATG4B   | RUSC1-AS1  | 0.413817166  | 1.56E-16 | positive |
| BIRC5   | AC139530.1 | 0.528059481  | 1.34E-27 | positive |
| ATG4B   | AC139530.1 | 0.442901465  | 5.74E-19 | positive |
| SPNS1   | AC115618.2 | 0.527917192  | 1.39E-27 | positive |
| SH3GLB1 | AC115618.2 | 0.543713609  | 1.82E-29 | positive |
| RHEB    | AC115618.2 | 0.435067269  | 2.74E-18 | positive |
| NPC1    | AC115618.2 | 0.401036438  | 1.55E-15 | positive |
| HSPA8   | AC115618.2 | 0.414189462  | 1.46E-16 | positive |
| GNAI3   | AC115618.2 | 0.464326363  | 6.45E-21 | positive |
| EIF2S1  | AC115618.2 | 0.40044944   | 1.72E-15 | positive |
| RHEB    | AC007405.3 | 0.452411813  | 8.13E-20 | positive |
| SPNS1   | AL606489.1 | 0.525749455  | 2.49E-27 | positive |
| PEA15   | AL606489.1 | 0.457679563  | 2.68E-20 | positive |
| NPC1    | AL606489.1 | 0.472844498  | 9.89E-22 | positive |
| BIRC5   | AL606489.1 | 0.468773727  | 2.44E-21 | positive |
| CHMP4B  | AC092687.3 | 0.416249994  | 9.97E-17 | positive |
| RAC1    | AC092171.2 | 0.499777487  | 1.85E-24 | positive |
| PEA15   | AC092171.2 | 0.440555565  | 9.20E-19 | positive |
| MTMR14  | AC092171.2 | 0.428286834  | 1.03E-17 | positive |
| HDAC1   | AC092171.2 | 0.413580637  | 1.63E-16 | positive |
| CHMP4B  | AC092171.2 | 0.434083315  | 3.33E-18 | positive |
| CAPN10  | AC092171.2 | 0.500206022  | 1.66E-24 | positive |
| BIRC5   | AC092171.2 | 0.421495036  | 3.75E-17 | positive |
| BAK1    | AC092171.2 | 0.434759885  | 2.91E-18 | positive |
| ATG9A   | AC092171.2 | 0.444749825  | 3.94E-19 | positive |
| ATG4B   | AC092171.2 | 0.486199797  | 4.70E-23 | positive |
| SQSTM1  | AL590666.2 | 0.465017777  | 5.55E-21 | positive |
| IKBKE   | AC099508.2 | -0.41150307  | 2.38E-16 | negative |
| FKBP1A  | AC099508.2 | -0.408619086 | 4.02E-16 | negative |
| BAK1    | AC099508.2 | -0.405429339 | 7.13E-16 | negative |
| IKBKE   | U62317.1   | 0.431860222  | 5.14E-18 | positive |
| CHMP4B  | U62317.1   | 0.429572105  | 8.01E-18 | positive |
| CAPN10  | U62317.1   | 0.55449974   | 8.22E-31 | positive |
| BIRC5   | U62317.1   | 0.459231766  | 1.93E-20 | positive |
| BAK1    | U62317.1   | 0.400283549  | 1.77E-15 | positive |
| ATG4B   | U62317.1   | 0.508529828  | 2.12E-25 | positive |

|           |            |              |          |          |
|-----------|------------|--------------|----------|----------|
| RAC1      | AC004832.5 | -0.411098363 | 2.57E-16 | negative |
| PRKCD     | AC004832.5 | -0.405869188 | 6.59E-16 | negative |
| IKBKE     | AC004832.5 | -0.545402926 | 1.13E-29 | negative |
| HDAC1     | AC004832.5 | -0.438871671 | 1.29E-18 | negative |
| FKBP1A    | AC004832.5 | -0.425918886 | 1.62E-17 | negative |
| CHMP4B    | AC004832.5 | -0.464290007 | 6.50E-21 | negative |
| BAK1      | AC004832.5 | -0.51236508  | 8.05E-26 | negative |
| CHMP4B    | AC120053.1 | 0.409822892  | 3.24E-16 | postive  |
| CAPN10    | AC120053.1 | 0.510996994  | 1.14E-25 | postive  |
| ATG4B     | AC120053.1 | 0.572918426  | 3.17E-33 | postive  |
| GAPDH     | AP000355.1 | -0.414897989 | 1.28E-16 | negative |
| FKBP1A    | AP000355.1 | -0.468324765 | 2.69E-21 | negative |
| CHMP4B    | AP000355.1 | -0.425274336 | 1.83E-17 | negative |
| PRKCD     | AC079360.1 | -0.453027292 | 7.15E-20 | negative |
| IKBKE     | AC079360.1 | -0.444315242 | 4.31E-19 | negative |
| GABARAPL1 | AC079360.1 | 0.478360141  | 2.86E-22 | postive  |
| FKBP1A    | AC079360.1 | -0.402235432 | 1.26E-15 | negative |
| CHMP4B    | AC079360.1 | -0.454230358 | 5.56E-20 | negative |
| BIRC5     | AC079360.1 | -0.428784025 | 9.33E-18 | negative |
| BAK1      | AC079360.1 | -0.434128057 | 3.30E-18 | negative |
| CAPN10    | AL354836.1 | 0.46471291   | 5.93E-21 | postive  |
| ATG4B     | AL354836.1 | 0.444294064  | 4.33E-19 | postive  |
| ATG4B     | AC010719.1 | 0.416379016  | 9.74E-17 | postive  |
| RAC1      | LINC00261  | -0.430834337 | 6.27E-18 | negative |
| GAPDH     | LINC00261  | -0.425278529 | 1.83E-17 | negative |
| FKBP1A    | LINC00261  | -0.437530563 | 1.68E-18 | negative |
| CHMP4B    | LINC00261  | -0.439136808 | 1.22E-18 | negative |
| BIRC5     | AP002360.1 | 0.403242674  | 1.05E-15 | postive  |
| ATG4B     | AC006213.4 | 0.432816556  | 4.26E-18 | postive  |
| GABARAPL1 | FLVCR1-DT  | -0.409183258 | 3.63E-16 | negative |
| RAC1      | AC048341.2 | 0.419338014  | 5.62E-17 | postive  |
| RAB24     | AC048341.2 | 0.450906785  | 1.11E-19 | postive  |
| IKBKE     | AC048341.2 | 0.400903691  | 1.59E-15 | postive  |
| FKBP1A    | AC048341.2 | 0.459536834  | 1.81E-20 | postive  |
| CHMP4B    | AC048341.2 | 0.486862808  | 4.03E-23 | postive  |
| CAPN10    | AC048341.2 | 0.594632769  | 2.84E-36 | postive  |
| ATG4B     | AC048341.2 | 0.550156778  | 2.90E-30 | postive  |
| MTMR14    | TMEM44-AS1 | 0.432382378  | 4.64E-18 | postive  |
| PRKCD     | HAGLR      | 0.405326836  | 7.26E-16 | postive  |
| IKBKE     | HAGLR      | 0.4985152    | 2.51E-24 | postive  |
| CAPN10    | AL118516.1 | 0.401800477  | 1.36E-15 | postive  |
| RAC1      | AL035071.1 | 0.490863109  | 1.57E-23 | postive  |
| RAB24     | AL035071.1 | 0.491796202  | 1.26E-23 | postive  |
| PRKCD     | AL035071.1 | 0.434080082  | 3.33E-18 | postive  |
| IKBKE     | AL035071.1 | 0.421653332  | 3.64E-17 | postive  |
| HDAC1     | AL035071.1 | 0.405948884  | 6.50E-16 | postive  |
| FKBP1A    | AL035071.1 | 0.546989068  | 7.19E-30 | postive  |



|          |            |              |          |          |
|----------|------------|--------------|----------|----------|
| CHMP4B   | AL035071.1 | 0.584341251  | 8.43E-35 | positive |
| CAPN10   | AL035071.1 | 0.602164621  | 2.19E-37 | positive |
| ATIC     | AL035071.1 | 0.430585764  | 6.59E-18 | positive |
| ATG4B    | AL035071.1 | 0.596586893  | 1.47E-36 | positive |
| RAC1     | LINC01018  | -0.435709561 | 2.41E-18 | negative |
| IKBKE    | LINC01018  | -0.475749457 | 5.16E-22 | negative |
| HDAC1    | LINC01018  | -0.434658718 | 2.97E-18 | negative |
| FKBP1A   | LINC01018  | -0.47258546  | 1.05E-21 | negative |
| CHMP4B   | LINC01018  | -0.430257612 | 7.02E-18 | negative |
| CAPN10   | LINC01018  | -0.416832867 | 8.95E-17 | negative |
| ATIC     | LINC01018  | -0.526661489 | 1.95E-27 | negative |
| ATG4B    | LINC01018  | -0.460176227 | 1.58E-20 | negative |
| RAC1     | SNHG15     | 0.438229698  | 1.47E-18 | positive |
| FKBP1A   | SNHG15     | 0.43347786   | 3.75E-18 | positive |
| CHMP4B   | SNHG15     | 0.441253815  | 8.00E-19 | positive |
| CAPN10   | SNHG15     | 0.445509024  | 3.38E-19 | positive |
| ATG4B    | SNHG15     | 0.403814377  | 9.51E-16 | positive |
| SH3GLB1  | AC104083.1 | 0.475191004  | 5.85E-22 | positive |
| PEA15    | AC104083.1 | 0.40939691   | 3.50E-16 | positive |
| RAC1     | PRR34-AS1  | 0.427753543  | 1.14E-17 | positive |
| FKBP1A   | PRR34-AS1  | 0.441916328  | 7.00E-19 | positive |
| CHMP4B   | PRR34-AS1  | 0.425247752  | 1.84E-17 | positive |
| RAC1     | CYTOR      | 0.583812264  | 1.00E-34 | positive |
| MAPK3    | CYTOR      | 0.402127849  | 1.28E-15 | positive |
| IKBKE    | CYTOR      | 0.495697622  | 4.96E-24 | positive |
| GAPDH    | CYTOR      | 0.494235257  | 7.04E-24 | positive |
| FKBP1A   | CYTOR      | 0.653292146  | 8.69E-46 | positive |
| EIF4EBP1 | CYTOR      | 0.416926723  | 8.80E-17 | positive |
| DDIT3    | CYTOR      | 0.410952446  | 2.64E-16 | positive |
| CHMP4B   | CYTOR      | 0.591708159  | 7.53E-36 | positive |
| CAPN10   | CYTOR      | 0.486751094  | 4.13E-23 | positive |
| BIRC5    | CYTOR      | 0.447198023  | 2.39E-19 | positive |
| BAK1     | CYTOR      | 0.487509355  | 3.46E-23 | positive |
| ATIC     | CYTOR      | 0.572694276  | 3.40E-33 | positive |
| ATG7     | CYTOR      | 0.427978398  | 1.09E-17 | positive |
| RAC1     | AC007773.1 | 0.418903754  | 6.09E-17 | positive |
| BIRC5    | AC007773.1 | 0.411320201  | 2.47E-16 | positive |
| ATIC     | AC007773.1 | 0.488602976  | 2.68E-23 | positive |
| GAPDH    | LINC02499  | -0.505352818 | 4.68E-25 | negative |
| CHMP4B   | LINC02499  | -0.404002763 | 9.19E-16 | negative |
| ATIC     | LINC02499  | -0.458823812 | 2.10E-20 | negative |
| ATG4B    | AC084036.1 | 0.447365062  | 2.31E-19 | positive |
| RAB24    | SNHG1      | 0.548617997  | 4.51E-30 | positive |
| PRKCD    | SNHG1      | 0.583418289  | 1.14E-34 | positive |
| NPC1     | SNHG1      | 0.465016985  | 5.55E-21 | positive |
| IKBKE    | SNHG1      | 0.5165532    | 2.76E-26 | positive |
| HDAC1    | SNHG1      | 0.514948308  | 4.16E-26 | positive |

|          |            |              |          |          |
|----------|------------|--------------|----------|----------|
| FKBP1A   | SNHG1      | 0.447996211  | 2.03E-19 | positive |
| CHMP4B   | SNHG1      | 0.472381508  | 1.10E-21 | positive |
| CAPN10   | SNHG1      | 0.659504317  | 6.39E-47 | positive |
| BIRC5    | SNHG1      | 0.561002433  | 1.20E-31 | positive |
| BAK1     | SNHG1      | 0.53104455   | 6.02E-28 | positive |
| ATIC     | SNHG1      | 0.545150642  | 1.21E-29 | positive |
| ATG4B    | SNHG1      | 0.62412246   | 8.37E-41 | positive |
| SPNS1    | AC115619.1 | -0.479812479 | 2.05E-22 | negative |
| SH3GLB1  | AC115619.1 | -0.467395991 | 3.30E-21 | negative |
| RAC1     | AC115619.1 | -0.434256191 | 3.22E-18 | negative |
| PEA15    | AC115619.1 | -0.446990365 | 2.50E-19 | negative |
| MAPK3    | AC115619.1 | -0.517617535 | 2.09E-26 | negative |
| HDAC1    | AC115619.1 | -0.4546995   | 5.04E-20 | negative |
| GNAI3    | AC115619.1 | -0.481831248 | 1.29E-22 | negative |
| CHMP4B   | AC115619.1 | -0.467542122 | 3.20E-21 | negative |
| BIRC5    | AC115619.1 | -0.408405029 | 4.18E-16 | negative |
| GAPDH    | DANCR      | 0.458360416  | 2.32E-20 | positive |
| RAC1     | CHASERR    | 0.403913914  | 9.34E-16 | positive |
| FKBP1A   | CHASERR    | 0.432680954  | 4.38E-18 | positive |
| DDIT3    | CHASERR    | 0.445747689  | 3.22E-19 | positive |
| CHMP4B   | CHASERR    | 0.443149625  | 5.46E-19 | positive |
| CAPN10   | CHASERR    | 0.444156035  | 4.45E-19 | positive |
| ATG4B    | CHASERR    | 0.474985771  | 6.12E-22 | positive |
| ATG4B    | AC092171.5 | 0.452277286  | 8.37E-20 | positive |
| SPNS1    | AC254633.1 | 0.431655355  | 5.35E-18 | positive |
| PRKCD    | SNHG14     | 0.443420371  | 5.17E-19 | positive |
| CAPN10   | SNHG14     | 0.416617702  | 9.32E-17 | positive |
| ATG4B    | SNHG14     | 0.40946796   | 3.45E-16 | positive |
| SPNS1    | CDC37L1-DT | -0.436826824 | 1.94E-18 | negative |
| PRKCD    | CDC37L1-DT | -0.45608227  | 3.76E-20 | negative |
| NPC1     | CDC37L1-DT | -0.463739407 | 7.32E-21 | negative |
| CDKN2A   | AC145343.1 | 0.411621289  | 2.33E-16 | positive |
| RAB24    | ZNNT1      | 0.409507932  | 3.43E-16 | positive |
| RAC1     | AC127024.5 | 0.415119567  | 1.23E-16 | positive |
| RAB24    | AC127024.5 | 0.454506273  | 5.25E-20 | positive |
| PRKCD    | AC127024.5 | 0.485043155  | 6.15E-23 | positive |
| IKBKE    | AC127024.5 | 0.510979783  | 1.14E-25 | positive |
| HDAC1    | AC127024.5 | 0.407139907  | 5.25E-16 | positive |
| CHMP4B   | AC127024.5 | 0.432467498  | 4.56E-18 | positive |
| CAPN10   | AC127024.5 | 0.604816909  | 8.74E-38 | positive |
| BIRC5    | AC127024.5 | 0.533514985  | 3.08E-28 | positive |
| BAK1     | AC127024.5 | 0.44194548   | 6.96E-19 | positive |
| ATIC     | AC127024.5 | 0.435629474  | 2.45E-18 | positive |
| ATG4B    | AC127024.5 | 0.573205903  | 2.90E-33 | positive |
| CAPN10   | AC024075.2 | 0.476766922  | 4.10E-22 | positive |
| ATG4B    | AC024075.2 | 0.539774695  | 5.49E-29 | positive |
| HSP90AB1 | SNHG16     | 0.472761294  | 1.01E-21 | positive |

|          |              |              |          |          |
|----------|--------------|--------------|----------|----------|
| ATIC     | SNHG16       | 0.458660629  | 2.18E-20 | positive |
| IKBKE    | LINC01503    | 0.434330249  | 3.17E-18 | positive |
| RAC1     | ITGB1-DT     | 0.414102699  | 1.48E-16 | positive |
| CHMP4B   | ITGB1-DT     | 0.444092299  | 4.51E-19 | positive |
| BAK1     | ITGB1-DT     | 0.40055923   | 1.69E-15 | positive |
| CDKN2A   | LINC01980    | 0.417514868  | 7.89E-17 | positive |
| IKBKE    | AL161785.1   | 0.454314102  | 5.46E-20 | positive |
| SPNS1    | AC084018.1   | 0.492851923  | 9.80E-24 | positive |
| NPC1     | AC084018.1   | 0.406947307  | 5.44E-16 | positive |
| CAPN10   | AC084018.1   | 0.411401985  | 2.43E-16 | positive |
| PRKCD    | LINC00665    | 0.416830294  | 8.96E-17 | positive |
| NPC1     | LINC00665    | 0.408412479  | 4.18E-16 | positive |
| HDAC1    | LINC00665    | 0.431109203  | 5.95E-18 | positive |
| CHMP4B   | LINC00665    | 0.42128657   | 3.90E-17 | positive |
| CAPN10   | LINC00665    | 0.40476462   | 8.03E-16 | positive |
| BAK1     | LINC00665    | 0.425096305  | 1.89E-17 | positive |
| ATIC     | LINC00665    | 0.424868598  | 1.98E-17 | positive |
| SPNS1    | AC008764.2   | 0.45130145   | 1.03E-19 | positive |
| SH3GLB1  | AC008764.2   | 0.421662267  | 3.63E-17 | positive |
| NPC1     | AC008764.2   | 0.417610239  | 7.75E-17 | positive |
| CHMP4B   | AC064836.2   | 0.403351475  | 1.03E-15 | positive |
| ATG4B    | AC064836.2   | 0.416794804  | 9.02E-17 | positive |
| IKBKE    | HLA-DQB1-AS1 | 0.405487993  | 7.06E-16 | positive |
| GAPDH    | AC021074.3   | -0.44177944  | 7.20E-19 | negative |
| FKBP1A   | AC021074.3   | -0.437285561 | 1.77E-18 | negative |
| CHMP4B   | AC021074.3   | -0.408487856 | 4.12E-16 | negative |
| SQSTM1   | AL033397.1   | 0.507490292  | 2.75E-25 | positive |
| RAC1     | AC046143.2   | 0.454911988  | 4.82E-20 | positive |
| FKBP1A   | AC046143.2   | 0.509380692  | 1.71E-25 | positive |
| EIF4EBP1 | AC046143.2   | 0.419615656  | 5.33E-17 | positive |
| CHMP4B   | AC046143.2   | 0.409483163  | 3.44E-16 | positive |
| PRKCD    | LINC01702    | -0.486626014 | 4.26E-23 | negative |
| PEA15    | LINC01702    | -0.442983667 | 5.64E-19 | negative |
| BAK1     | LINC01702    | -0.460820502 | 1.37E-20 | negative |
| FKBP1A   | AC026979.2   | 0.41123784   | 2.50E-16 | positive |
| EIF4EBP1 | AC026979.2   | 0.412354306  | 2.04E-16 | positive |
| SH3GLB1  | SCTR-AS1     | 0.404632821  | 8.22E-16 | positive |
| GNAI3    | SCTR-AS1     | 0.405723717  | 6.77E-16 | positive |
| BAK1     | SCTR-AS1     | 0.429421342  | 8.25E-18 | positive |
| RAC1     | ZFAS1        | 0.514002461  | 5.30E-26 | positive |
| RAB24    | ZFAS1        | 0.457756075  | 2.64E-20 | positive |
| FKBP1A   | ZFAS1        | 0.611785093  | 7.52E-39 | positive |
| CHMP4B   | ZFAS1        | 0.548001358  | 5.38E-30 | positive |
| CAPN10   | ZFAS1        | 0.448115655  | 1.98E-19 | positive |
| ATIC     | ZFAS1        | 0.599702093  | 5.10E-37 | positive |
| ATG4B    | ZFAS1        | 0.466111241  | 4.37E-21 | positive |
| BAK1     | AC120042.1   | -0.464629988 | 6.04E-21 | negative |

|           |            |              |          |          |
|-----------|------------|--------------|----------|----------|
| IKBKE     | AP006216.2 | -0.40737898  | 5.03E-16 | negative |
| ATIC      | AP006216.2 | -0.427707258 | 1.15E-17 | negative |
| RAB24     | PITPNA-AS1 | 0.414597598  | 1.35E-16 | postive  |
| ATIC      | PITPNA-AS1 | 0.422301944  | 3.22E-17 | postive  |
| IKBKE     | TPRG1-AS1  | -0.490621648 | 1.66E-23 | negative |
| CHMP4B    | TPRG1-AS1  | -0.434528641 | 3.05E-18 | negative |
| BAK1      | TPRG1-AS1  | -0.45088785  | 1.12E-19 | negative |
| EIF4EBP1  | AC109322.1 | 0.404748471  | 8.05E-16 | postive  |
| IKBKE     | LINC01671  | 0.440544762  | 9.22E-19 | postive  |
| RAC1      | SPINT1-AS1 | 0.437486837  | 1.70E-18 | postive  |
| PRKCD     | SPINT1-AS1 | 0.42571217   | 1.68E-17 | postive  |
| IKBKE     | SPINT1-AS1 | 0.49670916   | 3.89E-24 | postive  |
| CHMP4B    | SPINT1-AS1 | 0.513299509  | 6.35E-26 | postive  |
| CAPN10    | SPINT1-AS1 | 0.443976617  | 4.61E-19 | postive  |
| BAK1      | SPINT1-AS1 | 0.463322063  | 8.01E-21 | postive  |
| BIRC5     | KCNMB2-AS1 | 0.423899869  | 2.38E-17 | postive  |
| RAB24     | HEIH       | 0.54018788   | 4.89E-29 | postive  |
| RAB24     | SNHG32     | 0.517596025  | 2.11E-26 | postive  |
| PRKCD     | SNHG32     | 0.441550962  | 7.54E-19 | postive  |
| HSP90AB1  | SNHG32     | 0.510378111  | 1.33E-25 | postive  |
| CHMP4B    | SNHG32     | 0.419116012  | 5.85E-17 | postive  |
| CAPN10    | SNHG32     | 0.480382023  | 1.80E-22 | postive  |
| ATIC      | SNHG32     | 0.461034571  | 1.31E-20 | postive  |
| ATG4B     | SNHG32     | 0.509204324  | 1.79E-25 | postive  |
| IKBKE     | AC009159.3 | -0.441015489 | 8.39E-19 | negative |
| BAK1      | AC009159.3 | -0.419095142 | 5.88E-17 | negative |
| ATG4B     | AL359921.2 | 0.449571549  | 1.47E-19 | postive  |
| RAC1      | AC009166.1 | -0.463853518 | 7.14E-21 | negative |
| ATIC      | AC009166.1 | -0.451236204 | 1.04E-19 | negative |
| IKBKE     | ELF3-AS1   | 0.438403242  | 1.42E-18 | postive  |
| GABARAPL1 | ELF3-AS1   | -0.430720983 | 6.41E-18 | negative |
| DDIT3     | ELF3-AS1   | 0.400923198  | 1.58E-15 | postive  |
| BIRC5     | ELF3-AS1   | 0.422968889  | 2.84E-17 | postive  |
| RAC1      | AL021707.6 | 0.404799155  | 7.98E-16 | postive  |
| RAB24     | AL021707.6 | 0.428389761  | 1.01E-17 | postive  |
| IKBKE     | AL021707.6 | 0.423674683  | 2.48E-17 | postive  |
| FKBP1A    | AL021707.6 | 0.434464373  | 3.09E-18 | postive  |
| CHMP4B    | AL021707.6 | 0.430464756  | 6.74E-18 | postive  |
| CAPN10    | AL021707.6 | 0.574617114  | 1.87E-33 | postive  |
| ATG4B     | AL021707.6 | 0.51164923   | 9.65E-26 | postive  |
| SPNS1     | ATXN1-AS1  | 0.441173222  | 8.13E-19 | postive  |
| IKBKE     | MIR23AHG   | 0.410061971  | 3.10E-16 | postive  |
| CHMP4B    | MIR23AHG   | 0.454053729  | 5.77E-20 | postive  |
| CAPN10    | MIR23AHG   | 0.446882819  | 2.55E-19 | postive  |
| PRKCD     | AC004816.1 | 0.414379001  | 1.41E-16 | postive  |
| MAPK3     | AC004816.1 | 0.406663749  | 5.72E-16 | postive  |
| HDAC1     | AC004816.1 | 0.450053591  | 1.33E-19 | postive  |

|           |            |              |          |          |
|-----------|------------|--------------|----------|----------|
| GABARAPL1 | AC004816.1 | -0.422824001 | 2.91E-17 | negative |
| FKBP1A    | AC004816.1 | 0.484899472  | 6.36E-23 | postive  |
| EIF4EBP1  | AC004816.1 | 0.411365298  | 2.45E-16 | postive  |
| CHMP4B    | AC004816.1 | 0.443979438  | 4.61E-19 | postive  |
| CDKN2A    | AC004816.1 | 0.457096088  | 3.04E-20 | postive  |
| CAPN10    | AC004816.1 | 0.412149099  | 2.12E-16 | postive  |
| BIRC5     | AC004816.1 | 0.597636552  | 1.03E-36 | postive  |
| ATIC      | AC004816.1 | 0.471469118  | 1.34E-21 | postive  |
| ATG7      | AC004816.1 | 0.400962023  | 1.57E-15 | postive  |
| ATG4B     | AC004816.1 | 0.420329914  | 4.66E-17 | postive  |
| RAB24     | AC024060.2 | 0.475192589  | 5.85E-22 | postive  |
| MTMR14    | AC024060.2 | 0.406416091  | 5.98E-16 | postive  |
| IKBKE     | AC024060.2 | 0.421870263  | 3.49E-17 | postive  |
| FKBP1A    | AC024060.2 | 0.466560768  | 3.96E-21 | postive  |
| DDIT3     | AC024060.2 | 0.420369776  | 4.63E-17 | postive  |
| CHMP4B    | AC024060.2 | 0.440766341  | 8.82E-19 | postive  |
| CAPN10    | AC024060.2 | 0.593648305  | 3.94E-36 | postive  |
| BIRC5     | AC024060.2 | 0.427710175  | 1.15E-17 | postive  |
| ATG4B     | AC024060.2 | 0.586712883  | 3.90E-35 | postive  |
| RAB24     | AC008610.1 | 0.470344058  | 1.72E-21 | postive  |
| CHMP4B    | AC008610.1 | 0.40675561   | 5.63E-16 | postive  |
| CAPN10    | AC008610.1 | 0.471936381  | 1.21E-21 | postive  |
| ATIC      | AC008610.1 | 0.405172529  | 7.47E-16 | postive  |
| ATG4B     | AC008610.1 | 0.461359491  | 1.22E-20 | postive  |
| SQSTM1    | ZFPM2-AS1  | 0.490652586  | 1.65E-23 | postive  |
| CHMP4B    | SNHG30     | 0.409110668  | 3.68E-16 | postive  |
| CAPN10    | SNHG30     | 0.413115762  | 1.78E-16 | postive  |
| BIRC5     | SNHG30     | 0.519200387  | 1.39E-26 | postive  |
| ATG4B     | SNHG30     | 0.458630549  | 2.19E-20 | postive  |
| SPNS1     | AC009779.2 | 0.48387803   | 8.06E-23 | postive  |
| PRKCD     | AC009779.2 | 0.411833725  | 2.25E-16 | postive  |
| NPC1      | AC009779.2 | 0.424531601  | 2.11E-17 | postive  |
| MAPK3     | AC009779.2 | 0.461178127  | 1.27E-20 | postive  |
| CHMP4B    | AC009779.2 | 0.411369165  | 2.44E-16 | postive  |
| BIRC5     | AC009779.2 | 0.424556229  | 2.10E-17 | postive  |
| PRKCD     | AC015908.3 | -0.435184151 | 2.68E-18 | negative |
| NPC1      | AC015908.3 | -0.40495069  | 7.77E-16 | negative |
| MAPK3     | AC015908.3 | -0.464663461 | 5.99E-21 | negative |
| GNAI3     | AC015908.3 | -0.401058597 | 1.55E-15 | negative |
| GAPDH     | AC015908.3 | -0.409505118 | 3.43E-16 | negative |
| FKBP1A    | AC015908.3 | -0.442020601 | 6.85E-19 | negative |
| CHMP4B    | AC015908.3 | -0.491801746 | 1.26E-23 | negative |
| CAPN10    | AC015908.3 | -0.418531124 | 6.53E-17 | negative |
| BIRC5     | AC015908.3 | -0.43357749  | 3.67E-18 | negative |
| BAK1      | AC015908.3 | -0.517135586 | 2.37E-26 | negative |
| ATIC      | AC015908.3 | -0.40960413  | 3.37E-16 | negative |
| PRKCD     | AC011477.1 | 0.429610167  | 7.96E-18 | postive  |

|        |             |               |           |          |
|--------|-------------|---------------|-----------|----------|
| CAPN10 | AC011477. 1 | 0. 405140393  | 7. 51E-16 | postive  |
| ATG4B  | AC011477. 1 | 0. 439040866  | 1. 25E-18 | postive  |
| RAC1   | F11-AS1     | -0. 492133252 | 1. 16E-23 | negative |
| PRKCD  | F11-AS1     | -0. 416078179 | 1. 03E-16 | negative |
| MAPK3  | F11-AS1     | -0. 439380128 | 1. 16E-18 | negative |
| IKBKE  | F11-AS1     | -0. 473691063 | 8. 19E-22 | negative |
| GAPDH  | F11-AS1     | -0. 481806922 | 1. 30E-22 | negative |
| FKBP1A | F11-AS1     | -0. 572161484 | 4. 01E-33 | negative |
| CHMP4B | F11-AS1     | -0. 55727883  | 3. 63E-31 | negative |
| BAK1   | F11-AS1     | -0. 442926663 | 5. 71E-19 | negative |
| ATIC   | F11-AS1     | -0. 600254466 | 4. 22E-37 | negative |
| RAC1   | AC005332. 3 | 0. 40485204   | 7. 90E-16 | postive  |
| CAPN10 | AC005332. 3 | 0. 402954382  | 1. 11E-15 | postive  |
| BIRC5  | AC005332. 3 | 0. 444369571  | 4. 26E-19 | postive  |
| ATIC   | Z97056. 1   | -0. 422114338 | 3. 33E-17 | negative |
