# Supplementary material for: Immunoautophagy-Related Long Noncoding RNA (IAR-lncRNA) Signature Predicts Survival in Hepatocellular Carcinoma
Source: MDPI journal article supplement (doi:10.3390/biology10121301), 2021-12-09
Supplement: s1 [file s1]

| gene       | logFC        | pValue      | fdr         |
|------------|--------------|-------------|-------------|
| PKMYT1     | 1.294019747  | 2.84E-38    | 1.76E-35    |
| NCAPG      | 1.268907201  | 2.80E-38    | 1.76E-35    |
| SLC2A1     | 1.012836333  | 3.71E-15    | 3.30E-14    |
| NEK2       | 1.10363484   | 1.82E-33    | 2.73E-31    |
| PBK        | 1.015808822  | 7.17E-30    | 6.88E-28    |
| UGT1A2P    | -1.08935783  | 6.83E-10    | 2.57E-09    |
| DLGAP5     | 1.284993994  | 2.56E-35    | 5.59E-33    |
| LPAR2      | 1.09903998   | 2.41E-16    | 2.71E-15    |
| BPIFB2     | 1.01080046   | 0.007488312 | 0.010291118 |
| CASC9      | 1.24014489   | 5.98E-09    | 1.93E-08    |
| UAP1L1     | 1.132676594  | 9.86E-14    | 6.81E-13    |
| MAFG-DT    | 1.058575085  | 5.39E-22    | 1.80E-20    |
| SKA1       | 1.369497117  | 2.66E-38    | 1.76E-35    |
| ASF1B      | 1.009853627  | 7.57E-36    | 1.96E-33    |
| CENPA      | 1.475811691  | 1.60E-40    | 4.47E-37    |
| CHEK1      | 1.021601751  | 2.71E-36    | 8.63E-34    |
| CDC6       | 1.154804907  | 1.36E-36    | 4.58E-34    |
| CENPF      | 1.134186024  | 5.98E-30    | 5.94E-28    |
| CDC45      | 1.157251819  | 2.07E-37    | 9.60E-35    |
| AC084375.1 | -1.042664477 | 9.86E-06    | 1.98E-05    |
| NDC80      | 1.061692652  | 2.10E-34    | 3.89E-32    |
| TUSC3      | 1.030729001  | 3.28E-08    | 9.46E-08    |
| PLK1       | 1.310769429  | 3.08E-39    | 4.90E-36    |
| GTSE1      | 1.384088625  | 1.91E-32    | 2.60E-30    |
| CCNF       | 1.036895754  | 4.35E-35    | 8.98E-33    |
| DEPDC1B    | 1.533647691  | 3.33E-34    | 5.99E-32    |
| C12orf75   | 1.172780308  | 1.55E-22    | 5.67E-21    |
| ASPM       | 1.009746413  | 1.43E-25    | 8.19E-24    |
| CDC20      | 1.033149615  | 4.38E-39    | 5.93E-36    |
| TRAIP      | 1.082796851  | 1.50E-33    | 2.35E-31    |
| KIF4A      | 1.258832595  | 5.32E-39    | 5.93E-36    |
| IL4I1      | 1.353891428  | 8.57E-20    | 1.79E-18    |
| PRR11      | 1.407752203  | 2.25E-41    | 8.34E-38    |
| MKI67      | 1.143617235  | 6.12E-34    | 1.05E-31    |
| CDC25C     | 1.143344748  | 9.27E-32    | 1.20E-29    |
| MAD2L1     | 1.112427238  | 7.57E-36    | 1.96E-33    |
| CDC7       | 1.089733706  | 1.89E-31    | 2.31E-29    |
| CCNE1      | 1.207016867  | 1.14E-29    | 1.06E-27    |
| HJURP      | 1.233764799  | 3.12E-37    | 1.34E-34    |
| MYBL2      | 1.260890883  | 2.08E-38    | 1.66E-35    |
| KIF2C      | 1.347087761  | 2.32E-42    | 2.25E-38    |
| PCLAF      | 1.076785402  | 2.16E-37    | 9.60E-35    |
| FANCI      | 1.047441659  | 1.02E-35    | 2.53E-33    |
| MAGEA6     | 1.395989486  | 2.11E-08    | 6.27E-08    |
| CA9        | 2.825584219  | 1.01E-21    | 3.21E-20    |
| CHAF1B     | 1.352803184  | 1.21E-35    | 2.88E-33    |

|            |              |             |             |
|------------|--------------|-------------|-------------|
| TRIP13     | 1.434085058  | 4.04E-42    | 2.25E-38    |
| AC099850.3 | 1.492299608  | 3.08E-35    | 6.61E-33    |
| TMEM132A   | 1.07156359   | 4.59E-11    | 2.07E-10    |
| KIF11      | 1.105216723  | 1.11E-34    | 2.13E-32    |
| EXO1       | 1.292582147  | 5.82E-36    | 1.62E-33    |
| DTL        | 1.035212731  | 1.37E-30    | 1.45E-28    |
| IGSF3      | 1.164762155  | 2.11E-21    | 6.36E-20    |
| ANLN       | 1.264561573  | 1.11E-32    | 1.56E-30    |
| CDCA5      | 1.001316059  | 1.08E-36    | 3.88E-34    |
| NTS        | 1.341893693  | 3.99E-05    | 7.39E-05    |
| MELK       | 1.18132737   | 1.20E-35    | 2.88E-33    |
| FOXM1      | 1.084334573  | 1.37E-32    | 1.88E-30    |
| TROAP      | 1.248166158  | 2.68E-34    | 4.89E-32    |
| ECT2       | 1.089171253  | 5.74E-33    | 8.42E-31    |
| MAGEC2     | 1.032864306  | 0.002352724 | 0.003454963 |
| RAD51AP1   | 1.072933007  | 1.51E-29    | 1.38E-27    |
| CENPO      | 1.000538134  | 2.02E-34    | 3.81E-32    |
| CDT1       | 1.062840467  | 8.80E-38    | 4.67E-35    |
| ARHGAP11A  | 1.132409647  | 9.49E-32    | 1.21E-29    |
| CCNB2      | 1.051014114  | 1.56E-35    | 3.61E-33    |
| NCAPH      | 1.276066935  | 5.91E-38    | 3.29E-35    |
| DKK1       | 1.116270057  | 2.44E-05    | 4.63E-05    |
| CDK1       | 1.03096323   | 5.47E-36    | 1.60E-33    |
| CDCA8      | 1.028707946  | 6.51E-37    | 2.50E-34    |
| PAPLN      | 1.033552389  | 3.26E-09    | 1.10E-08    |
| KIFC1      | 1.019935105  | 1.90E-35    | 4.23E-33    |
| SKA3       | 1.262377837  | 5.64E-35    | 1.12E-32    |
| NUF2       | 1.284964846  | 5.11E-35    | 1.04E-32    |
| SSX1       | 1.154775708  | 2.08E-05    | 3.99E-05    |
| CEP55      | 1.577616419  | 4.92E-39    | 5.93E-36    |
| BUB1       | 1.365208789  | 2.63E-38    | 1.76E-35    |
| SPC25      | 1.140439187  | 2.10E-37    | 9.60E-35    |
| PKIB       | 1.238300248  | 3.53E-12    | 1.91E-11    |
| KIF20A     | 1.146936942  | 9.58E-34    | 1.59E-31    |
| PLPP2      | 1.083792843  | 3.64E-06    | 7.76E-06    |
| NXPH4      | 1.784631562  | 3.09E-20    | 6.99E-19    |
| KIF18B     | 1.516469187  | 9.77E-37    | 3.63E-34    |
| KRT19      | 1.078085062  | 2.99E-06    | 6.46E-06    |
| COX7B2     | 1.04020161   | 4.40E-05    | 8.10E-05    |
| SPHK1      | 1.168328517  | 8.74E-14    | 6.08E-13    |
| SLC16A3    | 1.15027044   | 4.36E-23    | 1.73E-21    |
| OIP5       | 1.040756806  | 3.46E-31    | 4.10E-29    |
| CENPM      | 1.143018063  | 2.81E-39    | 4.90E-36    |
| ELOVL7     | 1.257556141  | 4.60E-12    | 2.43E-11    |
| TTC36      | -1.019568748 | 5.23E-15    | 4.56E-14    |
| BIRC5      | 1.046818624  | 2.66E-39    | 4.90E-36    |
| AP1M2      | 1.073891399  | 4.37E-13    | 2.74E-12    |

|            |              |          |          |
|------------|--------------|----------|----------|
| GINS1      | 1.18635892   | 7.95E-36 | 2.01E-33 |
| PAQR5      | 1.079169539  | 4.98E-12 | 2.62E-11 |
| ORC1       | 1.311057837  | 1.24E-36 | 4.32E-34 |
| MAGEA3     | 1.329967302  | 1.24E-07 | 3.28E-07 |
| CDCA3      | 1.258166867  | 5.06E-37 | 2.09E-34 |
| AURKB      | 1.051562592  | 1.08E-32 | 1.54E-30 |
| TEDC2      | 1.129810191  | 4.15E-36 | 1.25E-33 |
| FAM83A-AS1 | -1.151479482 | 6.48E-06 | 1.34E-05 |
| BUB1B      | 1.411074376  | 3.62E-36 | 1.12E-33 |
