# Supplementary material for: Immunoautophagy-Related Long Noncoding RNA (IAR-lncRNA) Signature Predicts Survival in Hepatocellular Carcinoma
Source: Biology (Basel). 2021 Dec 9;10(12):1301. doi: 10.3390/biology10121301 (PMC8698564; doi:10.3390/biology10121301)
Supplement: Supplementary file 1 [file biology-10-01301-s001.zip]

Archive with 4 entries (4 files):
- biology-1472829-supplementary.pdf
- Supplementary File S1.pdf
- Supplementary File S2.pdf
- Supplementary File S3.pdf
